# Supplementary material
Source: PubMed Central journal article supplement (PMC10562991)
Supplement: jamapediatr-e234038-s001.pdf [file jamapediatr-e234038-s001.pdf]

## Supplementary Online Content

García-Hermoso A, López-Gil JF, Izquierdo M, Robinson Ramírez-Vélez R, Ezzatvar Y. Exercise and insulin resistance markers in children and adolescents with excess weight: a systematic review and network meta-analysis. *JAMA Pediatr*. Published online October 9, 2023. doi:10.1001/jamapediatrics.2023.4038

**eMethods 1.** Electronic Search Strategy

**eTable 1.** Table of Characteristics

**eMethods 2.** Data Analysis

**eMethods 3.** Excluded Studies and Reasons for Exclusion

**eTable 2.** Results of the Cochrane Risk-of-Bias Tool for Randomized Controlled Trials (RoB-2)

**eFigure 1.** Effect of Exercise Programs on Fasting Insulin in Children and Adolescents With Excess Weight

**eFigure 2.** Effect of Exercise Programs on Homeostatic Model Assessment for Insulin Resistance (HOMA-IR) in Children and Adolescents With Excess Weight

**eFigure 3.** Effect of Exercise Programs on Fasting Glucose in Children and Adolescents With Excess Weight

**eFigure 4.** Effect of Exercise Programs on 2-Hour Oral Glucose Tolerance in Children and Adolescents With Excess Weight

**eFigure 5.** Effect of Exercise Programs on Glycated Hemoglobin in Children and Adolescents With Excess Weight

**eFigure 6.** Sensitivity Analyses Once Each Study Was Excluded for Fasting Insulin

**eFigure 7.** Sensitivity Analyses Once Each Study Was Excluded for Homeostatic Model Assessment for Insulin Resistance (HOMA-IR)

**eFigure 8.** Sensitivity Analyses Once Each Study Was Excluded for 2-Hour Oral Glucose Tolerance

**eFigure 9.** Sensitivity Analyses Once Each Study Was Excluded for Fasting Glucose

**eFigure 10.** Dose-Response Association Between Metabolic Equivalent of Task Minutes (MET-min) per Week and Differences in Homeostatic Model Assessment for Insulin Resistance (HOMA-IR) in Children and Adolescents With Excess Weight and Insulin Resistance (ie, HOMA-IR  $\geq$  3.16)

**eFigure 11.** Dose-Response Association Between Metabolic Equivalent of Task Minutes (MET-min) per Week and Differences in Fasting Glucose in Children and Adolescents With Excess Weight

**eFigure 12.** Rankogram for Each Type of Physical Exercise

**eFigure 13.** Network Meta-analysis Confidence Rating for Glucose, Insulin, and Homeostatic Model Assessment for Insulin Resistance Outcomes

**eReferences**

This supplementary material has been provided by the authors to give readers additional information about their work.

## **eMethods.** Electronic Search Strategy

PubMed (262 results)

```
(((((("Body Weight"[Mesh]) OR "Overweight"[Mesh]) OR "Obesity"[Mesh])) AND "Child"[Mesh]) OR "Adolescent"[Mesh]) AND (("Exercise"[Mesh]) OR "Resistance Training"[Mesh] OR "Aerobic Exercise"[Mesh]) AND ("Randomized Controlled Trial"[Publication Type] OR "Controlled Clinical Trial"[Publication Type]) AND "Humans"[Mesh] AND ("Homeostasis Model Assessment"[Mesh] OR "Glucose"[Mesh] OR "Insulin"[Mesh]))
```

EMBASE (16 results)

```
('body weight'/exp OR 'overweight'/exp OR 'obesity'/exp) AND 'child'/exp OR 'adolescent'/exp AND ('physical exercise'/exp OR 'aerobic exercise'/exp OR 'resistance exercise'/exp) AND ('randomized controlled trial'/exp OR 'controlled clinical trial'/exp) AND 'human'/exp AND ('homeostasis model assessment'/exp OR 'fasting glucose'/exp OR 'fasting insulin'/exp)
```

Cochrane Controlled Register of Trials (583 results)

```
(((((("Body Weight"[MeSH Terms]) OR "Overweight"[MeSH Terms]) OR "Obesity"[MeSH Terms])) AND "Child"[MeSH Terms]) OR "Adolescent"[MeSH Terms]) AND (("Exercise"[MeSH Terms]) OR "Resistance Training"[MeSH Terms] OR "Aerobic Exercise"[MeSH Terms]) AND ("Randomized Controlled Trial"[Publication Type] OR "Controlled Clinical Trial"[Publication Type]) AND "Humans"[MeSH Terms] AND ("Homeostasis
```

Model Assessment"[MeSH Terms] OR "Glucose"[MeSH Terms] OR  
"Insulin"[MeSH Terms])

Scopus (844 results)

( TITLE-ABS-KEY ( ( "body weight" OR overweight OR obesity ) AND  
child OR adolescent ) AND TITLE-ABS-KEY ( exercise OR "resistance  
training" OR "aerobic exercise" ) ) AND ( LIMIT-TO ( DOCTYPE , "ar" )  
OR LIMIT-TO ( DOCTYPE , "re" ) OR EXCLUDE ( DOCTYPE , "re" ) )  
AND ( LIMIT-TO ( SUBJAREA , "MEDI" ) OR LIMIT-TO ( SUBJAREA ,  
"NURS" ) ) AND ( LIMIT-TO ( EXACTKEYWORD , "Homeostasis Model  
Assessment" ) OR LIMIT-TO ( EXACTKEYWORD , "Insulin" ) OR  
LIMIT-TO ( EXACTKEYWORD , "randomized controlled trial" ) )

Web of Science (25 results)

((((AB=("body weight" OR "overweight" OR "obesity")) AND AB=(child OR  
adolescent)) AND AB=(exercise OR "resistance training" OR "aerobic  
exercise")) AND AB=("randomized controlled trials" OR "controlled clinical  
trial")) AND TS=("homeostasis model assessment" OR glucose OR insulin)

CINAHL (13 results)

AB ("body weight" OR "overweight" OR "obesity") AND AB ("child" OR  
"adolescent") AND AB ("exercise" OR "resistance training" OR "endurance  
training" OR "aerobic exercise") AND TI "randomized controlled trial" AND  
AB ("homeostasis model assessment" OR "glucose" OR "insulin")

**eTable 1.** Table of Characteristics

| Study (year)<br>Country                              | Total n (females)<br>and n groups        | Mean age<br>(years) | Exercise<br>modalities | Exercise<br>duration<br>(weeks) | Estimated<br>METs-min per<br>week | Converted<br>METs-min per<br>week | Outcomes                                                                                      |
|------------------------------------------------------|------------------------------------------|---------------------|------------------------|---------------------------------|-----------------------------------|-----------------------------------|-----------------------------------------------------------------------------------------------|
| Ben Ounis et al. (2010) <sup>1</sup><br>Tunisia      | n=32 (9)<br>AT: n=16<br>Control: n=16    | 12-14               | AT                     | 8                               | 2538                              | 2500                              | Fasting glucose                                                                               |
| Benson et al. (2008) <sup>2</sup><br>New Zealand     | n=78 (32)<br>RT: n=37<br>Control: n= 41  | 12.2                | RT                     | 8                               | 540                               | 500                               | Fasting insulin, HOMA-IR,<br>fasting glucose                                                  |
| Campos et al. (2014) <sup>3</sup><br>Brazil          | n=42 (28)<br>AT: n=21<br>AT+RT: n=21     | 16                  | AT, CT                 | 48                              | No control<br>group               | No control<br>group               | Fasting glucose, fasting<br>insulin, HOMA-IR                                                  |
| Carrel et al. (2005) <sup>4</sup><br>USA             | n=50 (24)<br>AT: n=27<br>Control: n=23   | 12                  | AT                     | 36                              | 783                               | 750                               | Fasting insulin, fasting<br>glucose                                                           |
| Chae et al. (2010) <sup>5</sup><br>South Korea       | n=38 (17)<br>CT: n=19<br>Control: n=19   | 10                  | CT                     | 12                              | 1755                              | 2000                              | Fasting insulin, fasting<br>glucose, HOMA-IR                                                  |
| Corte-de-Araujo et al. (2012) <sup>6</sup><br>Brazil | n=30 (21)<br>ET: n=15<br>HIT: n=15       | 10                  | AT, HIIT               | 12                              | No control<br>group               | No control<br>group               | Serum glucose,<br>insulin, glycated<br>hemoglobin, HOMA-IR                                    |
| Damaso et al. (2014) <sup>7</sup><br>Brazil          | n=139 (82)<br>AT: n=55<br>AT+RT: n=61    | 15-19               | AT, CT                 | 48                              | No control<br>group               | No control<br>group               | Fasting glucose, fasting<br>insulin, HOMA-IR                                                  |
| Davis et al. (2020) <sup>8</sup><br>USA              | n=175 (107)<br>AT: n=90<br>Control: n=85 | 9.7                 | AT                     | 32                              | 1160                              | 1000                              | Fasting glucose, fasting<br>insulin, HOMA-IR                                                  |
| Davis et al. (2011) <sup>9</sup><br>USA              | n=26 (26)<br>CT: n=14<br>Control: n=12   | 15.8                | CT                     | 16                              | 698                               | 750                               | Fasting glucose, fasting<br>insulin, HOMA-IR, acute<br>insulin response, disposition<br>index |
| Davis et al. (2012) <sup>10</sup><br>USA             | n=222 (128)<br>low-dose (n=71)           | 9.4                 | AT, CT                 | 13                              | AT_low=800<br>AT_high=1600        | AT_low=750<br>AT_high=1500        | Fasting insulin, fasting<br>glucose, insulin AUC                                              |

|                                                                                        | high-dose (n=73)<br>Control (n=78)                                                                   |       |             |    |                                    |                                     |                                                  |
|----------------------------------------------------------------------------------------|------------------------------------------------------------------------------------------------------|-------|-------------|----|------------------------------------|-------------------------------------|--------------------------------------------------|
| de Lira et al. (2017) <sup>11</sup><br>Brazil                                          | n=84 (NR)<br>High-Intensity Training<br>(n=26)<br>Low-Intensity Training<br>(n=25)<br>Control (n=33) | 15    | HIIT, AT    | 12 | LIT=749<br>HIIT=969                | LIT=750<br>HIIT=1000                | Fasting glucose, fasting<br>insulin, HOMA-IR     |
| de Souza et al. (2022) <sup>12</sup><br>Brazil                                         | n=42 (24)<br>karate: n= 20<br>Control: n=22                                                          | 12-17 | AT          | 12 | 1545                               | 1500                                | Fasting glucose                                  |
| Dias et al. (2018) <sup>13</sup><br>Australia                                          | n=99 (53)<br>HIIT: n=33<br>MICT: n=32<br>Nutrition advice only:<br>n=34                              | 7-16  | AT, HIIT    | 12 | MICT=792<br>HIIT=840               | MICT=750<br>HIIT=1000               | HOMA-IR, fasting glucose                         |
| * Farah et al. (2013) <sup>14</sup> and<br>Silva et al. (2015) <sup>15</sup><br>Brazil | n=43 (10)<br>HIT: n=20<br>LIT: n=23                                                                  | 13-18 | AT          | 24 | No control<br>group                | No control<br>group                 | Fasting glucose, fasting<br>insulin, and HOMA-IR |
| Faria et al. (2020) <sup>16</sup><br>Brazil                                            | n=76 (44)<br>MICT: n=24<br>HIIT: n=26<br>Control: n=26                                               | 16.1  | CT, HIIT+RT | 12 | CT=442<br>HIIT+RT=386              | CT=500<br>HIIT+RT=500               | Fasting insulin, HOMA-IR                         |
| Farpour-Lambert et al. (2009) <sup>17</sup><br>Switzerland                             | n=44 (16)<br>CT: n=22<br>Control: n=22                                                               | 8.9   | CT          | 12 | 837                                | 750                                 | Fasting insulin, HOMA-IR,<br>fasting glucose     |
| Ferguson et al. (1999) <sup>18</sup><br>USA                                            | n=73 (53)<br>AT: n=37<br>Control: n=36                                                               | 7-11  | AT          | 16 | 1060                               | 1000                                | Fasting insulin, fasting<br>glucose              |
| Ghorbanian et al. (2013) <sup>19</sup><br>Iran                                         | n=30 (0)<br>AT: n=15<br>Control: n=15                                                                | 17.3  | AT          | 8  | 1408                               | 1500                                | Fasting glucose                                  |
| González-Ruiz et al. (2021) <sup>20</sup><br>Colombia                                  | n=120 (81)<br>HIPE: n=30<br>LIPE: n=30<br>PLUS: n=30                                                 | 11-17 | CT, HIIT+RT | 24 | HIPE=1764<br>LIPE=954<br>PLUS=1224 | HIPE=1500<br>LIPE=1000<br>PLUS=1000 | Fasting insulin, HOMA-IR,<br>fasting glucose     |

|                                                     |                                                                                                                           |       |          |    |                            |                            |                                                                                                                     |
|-----------------------------------------------------|---------------------------------------------------------------------------------------------------------------------------|-------|----------|----|----------------------------|----------------------------|---------------------------------------------------------------------------------------------------------------------|
|                                                     | Control: n=30                                                                                                             |       |          |    |                            |                            |                                                                                                                     |
| Grace et al. (2021) <sup>21</sup><br>South Africa   | n=41 (15)<br>CT: n=22<br>Control: n=19                                                                                    | 14    | CT       | 10 | 398                        | 500                        | Fasting insulin, HOMA-IR                                                                                            |
| Jeon et al. (2013) <sup>22</sup><br>South Korea     | n=15 (NR)<br>CT: n = 8<br>Control: n = 7                                                                                  | 13-16 | CT       | 12 | 710                        | 750                        | Fasting insulin, HOMA-IR,<br>fasting glucose                                                                        |
| Kang et al. (2002) <sup>23</sup><br>USA             | n=59 (54)<br>Lifestyle education:<br>(n=18)<br>Lifestyle<br>education+MIPT: (n=21)<br>Lifestyle<br>education+HIPT: (n=20) | 14-15 | AT, HIIT | 32 | Moderate=1032<br>High=1232 | Moderate=1000<br>High=1500 | Fasting insulin, fasting<br>glucose                                                                                 |
| Karacabey et al. (2009) <sup>24</sup><br>Turkey     | n=40 (0)<br>AT: n=20<br>Control: n=20                                                                                     | 10-12 | AT       | 12 | 810                        | 750                        | Fasting insulin                                                                                                     |
| Kelly et al. (2004) <sup>25</sup><br>USA            | n=20 (13)<br>AT: n=10<br>Control: n=10                                                                                    | 10.9  | AT       | 8  | 1088                       | 1000                       | Fasting insulin, fasting<br>glucose                                                                                 |
| Kim et al. (2007) <sup>26</sup><br>South Korea      | n=26 (0)<br>AT: n=14<br>Control: n=12                                                                                     | 17    | AT       | 6  | 1760                       | 2000                       | Fasting insulin, HOMA-IR,<br>fasting glucose                                                                        |
| Kim et al. (2020) <sup>27</sup><br>South Korea      | n=48 (48)<br>AT: n=24<br>Control: n=24                                                                                    | 14-16 | AT       | 12 | 2200                       | 2000                       | Fasting insulin, HOMA-IR,<br>fasting glucose                                                                        |
| Koot et al. (2016) <sup>28</sup><br>The Netherlands | n=51 (29)<br>Inpatient treatment:<br>(n=23)<br>Ambulant treatment:<br>(n=21)<br>Usual care: (n=18)                        | 14.7  | AT       | 24 | 1160                       | 1000                       | HOMA-IR                                                                                                             |
| Lee et al. (2013) <sup>29</sup><br>USA              | n=44 (44)<br>AT: n=16<br>RT: n=16<br>Control: n=12                                                                        | 14-15 | AT, RT   | 12 | AT=1260<br>RT=774          | AT=1500<br>RT=750          | Fasting glucose, fasting<br>insulin, fasting hepatic<br>glucose production, fasting<br>hepatic insulin sensitivity, |

|                                                 |                                                           |       |            |    |                     |                     | glucose at 2h, insulin at 2h, glucose AUC, insulin AUC, insulin sensitivity                                         |
|-------------------------------------------------|-----------------------------------------------------------|-------|------------|----|---------------------|---------------------|---------------------------------------------------------------------------------------------------------------------|
| Lee et al. (2019) <sup>30</sup><br>USA          | n=118 (76)<br>AT: n=38<br>RT: n=40<br>CT: n=40            | 12-17 | AT, CT, RT | 24 | No control group    | No control group    | Fasting glucose, 2h glucose                                                                                         |
| Lee et al. (2010) <sup>31</sup><br>South Korea  | n=18 (18)<br>AT: n=11<br>Control: n=7                     | 16.9  | AT         | 12 | 1232                | 1500                | Fasting insulin, HOMA-IR, fasting glucose                                                                           |
| Lee et al. (2012) <sup>32</sup><br>USA          | n=45 (0)<br>AT: n=16<br>RT: n=16<br>Control: n=13         | 14-15 | AT, RT     | 12 | AT=1350<br>RT=1080  | AT=1500<br>RT=1000  | Fasting insulin, fasting glucose, 3-h hyperinsulinemic euglycemic clamp, 2-h hyperglycemic clamp, disposition index |
| Leite et al. (2022) <sup>33</sup><br>Brazil     | n=94 (NR)<br>AT: n=64<br>Control: n=30                    | 13.5  | AT         | 12 | 1486                | 1500                | Fasting insulin, fasting glucose, HOMA-IR, QUICKI                                                                   |
| McCormack et al. (2014) <sup>34</sup><br>USA    | n=18 (13)<br>AT: n=10<br>Control: n=8                     | 13    | AT         | 8  | 588                 | 500                 | Fasting insulin, 2-h glucose, HOMA-IR                                                                               |
| Meng et al. (2022) <sup>35</sup><br>China       | n=45 (0)<br>HIIT: n = 15<br>AT: n = 15<br>Control: n = 15 | 11.2  | AT, HIIT   | 12 | AT=540<br>HIIT=1000 | AT=500<br>HIIT=1000 | Fasting glucose, fasting insulin, HOMA-IR                                                                           |
| Meyer et al. (2006) <sup>36</sup><br>Germany    | n=67 (49)<br>AT: n=33<br>Control: n=34                    | 14.7  | AT         | 24 | 1170                | 1000                | Fasting insulin, HOMA-IR                                                                                            |
| Murphy et al. (2009) <sup>37</sup><br>USA       | n=35 (17)<br>AT: n=23<br>Control: n=12                    | 10.2  | AT         | 12 | 720                 | 750                 | Fasting insulin, HOMA-IR, fasting glucose                                                                           |
| Park et al. (2012) <sup>38</sup><br>South Korea | n=29 (15)<br>CT: n = 15<br>Control: n = 14                | 12.2  | CT         | 12 | 1065                | 1000                | Fasting insulin, fasting glucose                                                                                    |
| Racil et al. (2016) <sup>39</sup><br>Tunisia    | n=68 (68)<br>HIIT: n=23                                   | 16.6  | HIIT       | 12 | 1089                | 1000                | Fasting insulin, HOMA-IR, fasting glucose                                                                           |



|                                                      |                                                               |       |             |    |                             |                              |                                                                                                           |
|------------------------------------------------------|---------------------------------------------------------------|-------|-------------|----|-----------------------------|------------------------------|-----------------------------------------------------------------------------------------------------------|
|                                                      | P+HIIT: n=26<br>Control: n=19                                 |       |             |    |                             |                              |                                                                                                           |
| Racil et al. (2013) <sup>40</sup><br>Tunisia         | n=34 (34)<br>HIIT: n=11<br>AT: n=11<br>Control: n=12          | 16    | AT, HIIT+RT | 12 | MIIT=800<br>HIIT=1089       | MIIT=750<br>HIIT=1000        | Fasting insulin, HOMA-IR,<br>fasting glucose                                                              |
| Ramezani et al. (2017) <sup>41</sup><br>Iran         | n=60 (0)<br>AT: n=15<br>RT: n=15<br>CT: n=15<br>Control: n=15 | 10    | AT, RT, CT  | 8  | AT=1310<br>RT=602<br>CT=956 | AT=1500<br>RT=500<br>CT=1000 | Fasting glucose                                                                                           |
| Rasooli et al. (2021) <sup>42</sup><br>Iran          | n=40 (0)<br>RT: n=20<br>Control: n=20                         | 16    | RT          | 8  | 1200                        | 1000                         | Fasting glucose, fasting<br>insulin, HOMA-IR                                                              |
| Rosenbaum et al. (2007) <sup>43</sup><br>USA         | n=73 (31)<br>AT: n=49<br>Control: n=23                        | 13.6  | AT          | 16 | 261                         | 500                          | Fasting insulin, fasting<br>glucose, QUICKI, acute<br>insulin response                                    |
| Salahshoornezhad et al. (2022) <sup>44</sup><br>Iran | n=62 (62)<br>AT: n=31<br>Control: n=31                        | 9-12  | AT          | 10 | 783                         | 750                          | Fasting glucose                                                                                           |
| Savoie et al. (2014) <sup>45</sup><br>USA            | n=75 (49)<br>AT: n=38<br>Control: n=37                        | 10-16 | AT          | 24 | 780                         | 750                          | Fasting glucose, fasting<br>insulin, HOMA-IR, 2-h<br>glucose, 2-h insulin                                 |
| Seo et al. (2019) <sup>46</sup><br>South Korea       | n=103 (40)<br>RT: n=32<br>Control: n=71                       | 6-16  | RT          | 16 | 1350                        | 1500                         | HOMA-IR                                                                                                   |
| Shaibi et al. (2006) <sup>47</sup><br>USA            | n=22 (0)<br>HIIT: n=11<br>Control: n=11                       | 15    | HIIT        | 16 | 480                         | 500                          | Fasting insulin, fasting<br>glucose, insulin sensitivity,<br>acute insulin response,<br>disposition index |
| Son et al. (2017) <sup>48</sup><br>South Korea       | n=40 (40)<br>CT: n=20<br>Control: n=20                        | 15    | CT          | 12 | 1440                        | 1500                         | Fasting insulin, HOMA-IR,<br>fasting glucose                                                              |
| Sun et al. (2011) <sup>49</sup><br>China             | n=42 (17)<br>AT: n=25<br>Control: n=17                        | 13.6  | AT          | 10 | 834                         | 1000                         | Fasting insulin, HOMA-IR,<br>fasting glucose                                                              |

|                                                    |                                        |       |        |    |                     |                     |                                                                                                        |
|----------------------------------------------------|----------------------------------------|-------|--------|----|---------------------|---------------------|--------------------------------------------------------------------------------------------------------|
| Tjønnha et al. (2009) <sup>50</sup><br>Norway      | n=54 (14)<br>AIT: n=28<br>MTG: n=26    | 14    | AT     | 12 | No control<br>group | No control<br>group | Insulin, 2-h insulin, fasting<br>glucose, 2-h post-glucose<br>load, HOMA                               |
| Vasconcellos et al. (2016) <sup>51</sup><br>Brazil | n=20 (6)<br>AT: 10<br>Control: n=10    | 12-17 | AT     | 12 | 1098                | 1000                | Insulin, HOMA-IR, fasting<br>glucose, glucose tolerance<br>(60 min) and glucose<br>tolerance (120 min) |
| Wong et al. (2008) <sup>52</sup><br>Singapore      | n=24 (0)<br>CT: n=12<br>Control: n=12  | 13-14 | CT     | 12 | 734                 | 750                 | Fasting glucose                                                                                        |
| Wong et al. (2018) <sup>53</sup>                   | n=30 (30)<br>CT: n=15<br>Control: n=15 | 15.2  | CT     | 12 | 819                 | 1000                | Fasting insulin, HOMA-IR,<br>fasting glucose                                                           |
| Yetgin et al. (2020) <sup>54</sup><br>Turkey       | n=16 (0)<br>RT: n=8<br>AT: n=8         | 16.8  | AT, RT | 6  | No control<br>group | No control<br>group | Glucose, insulin, HOMA-IR                                                                              |
| Zehsaz et al. (2016) <sup>55</sup><br>Iran         | n=32 (0)<br>CT: n=16<br>Control: n=16  | 10.5  | CT     | 16 | 721                 | 750                 | Fasting insulin, HOMA-IR,<br>fasting glucose                                                           |

AT, Aerobic training; CT, concurrent training; HIIT, high intensity interval training; HIPE, High intensity physical exercise; HOMA-IR, Homeostatic model assessment of insulin resistance; LIPE, low intensity physical exercise; PLUS, combined HIPE and LIPE; QUICKI, quantitative insulin sensitivity check index; RT, resistance training; USA, United States of America.

\* Farah et al. (2013) and Silva et al. (2015) analyzed data from the same participants and the same intervention, however, both studies analyzed different outcomes.

## **eMethods 2. Data Analysis**

### *Effectiveness of exercise types (traditional meta-analysis)*

To determine the effect of physical exercise on insulin sensitivity outcomes comparing to a control group, random-effects inverse-variance models with the Hartung-Knapp-Sidik-Jonkman adjustment were used to assess the effects. To determine changes in outcomes (i.e., fasting glucose, fasting insulin, HOMA-IR and 24-h oral glucose tolerance test), the change differences between the exercise and control groups were calculated by using the pooled standard deviation (SD) of change in both groups. In cases where change scores SD were not available, they were estimated from 95% confidence intervals (CI) for either change outcome or intervention effect differences as well as pre-SD and post-SD values. It is important to clarify the following aspects regarding our statistical analyses: (1) meta-analyses were only performed for insulin sensitivity outcomes that were included in five or more studies<sup>56</sup>; (2) to avoid double-counting and following the Cochrane Handbook recommendations, when a study included more than two arms in comparison with a control group, we halved the number of participants in the control group for each of the comparisons<sup>57</sup>.

The presence of small-study effects was assessed using the Luis Furuya-Kanamori index (LFK)<sup>58</sup>. A value of  $-1$  indicates no asymmetry, while values between  $-1$  and  $-2$  indicate minor asymmetry, and values greater than  $-2$  indicate major asymmetry<sup>58</sup>.

A sensitivity analysis was conducted to assess the robustness of the summarized estimates and to identify whether a specific study contributed to any discrepancies. For this analysis, we systematically excluded one study at a time from the pool of included

studies, conducting the meta-analysis multiple times, with each iteration excluding a different study.

#### *Dose–response meta-analysis*

The energy expenditure dose of exercise in terms of METs-min per week was calculated using the Compendium of Physical Activities<sup>59</sup> according to frequency, intensity, type, and duration for each arm. Energy expenditure was classified into seven different groups by approximating the estimated METs-min per week to the closest convenient pre-specified grouping categories of 0 (control group), 500, 750, 1000, 1500, 2000 or 2500 METs-min per week (Supplementary Material 2). Non-linear dose-response meta-analyses were conducted to explore the dose-response association of exercise dose (i.e., METs-min per week) on insulin resistance markers using *drmeta* command following the recommendations by Crippa et al.<sup>60</sup>. We also carried out a sensitivity analysis using only those studies that included children and adolescents with a higher HOMA-IR levels than 3.16<sup>61</sup>.

#### *Network meta-analysis*

First, we qualitatively summarize the included randomized clinical trials and RCT in an *ad hoc* table describing direct and indirect comparisons. Second, before conducted the network meta-analysis (NMA), three assumptions were checked<sup>62</sup>: a) to prevent bias in the comparisons, which could lead to heterogeneity and inconsistency, the similarity and comparability of the trials included in the NMA were examined and confirmed. Similarity was assessed by checking whether samples in each exercise type were similar in the baseline distribution of variables understood as effect modifiers (i.e., sex, age); b) to ensure that the study-related conditions were homogenous, the absence of

heterogeneity in the results of pairwise comparisons was confirmed. The size and clinical relevance of heterogeneity was determined by the  $\tau^2$  statistic rated as low degree of clinical relevance (<0.04), moderate (0.04 to 0.14), or substantial (0.14 to 0.40) <sup>63</sup>; c) consistency and transitivity were checked to ensure that no relevant discrepancies exist between direct and indirect evidence. The similarity assumption was determined using the node-splitting method <sup>64</sup>.

To perform the NMA, the next steps were followed: we assessed the strength of the available evidence using a network geometry graph to display the evidence in the network for insulin resistance outcomes. In these figures, the size of the nodes was proportional to the number of participants in trials who received the intervention specified in the node, the thickness of continuous line connecting nodes proportional to number of trials directly comparing the two intervention <sup>65</sup>.

Comparative evaluation of the interventions effect on fasting glucose, insulin, and HOMA-IR were conducted through a random effects pairwise meta-analysis <sup>66</sup> and a frequentist NMA <sup>67</sup> for comparisons between interventions and control. We assessed heterogeneity using the  $I^2$  statistic, ranging from 0% to 100% <sup>68</sup>. Based on the values of  $I^2$ , we categorized heterogeneity as not important (0% to 30%), moderate (30% to 60%), substantial (60% to 75%), or considerable (75% to 100%) <sup>68</sup>. Similarly, the corresponding  $p$  values were considered.

Rankograms were established to indicate the probability that each treatment is the best available intervention. Furthermore, we estimated the surface under cumulative ranking (SUCRA) <sup>65</sup> for each intervention. The SUCRA assigns a value ranging from 0 to 1 to each intervention in the rankogram, which allows them to be ranked. A SUCRA value of approximately 0 denotes the worst available intervention, while a value of approximately 1 indicates the best available intervention. SUCRA condenses the

information about the effectiveness of each intervention into a single value, simplifying the complex results of network meta-analysis into just a few numbers. The significance of the SUCRA is highest when there is a consistent difference in preference between consecutive ranks across the entire rating scale. However, SUCRA scores were reported as percentages, for clarity.

### **eMethods 3. Excluded Studies and Reasons for Exclusion**

#### **Reason for exclusion: Duplicated data**

Ackel-D'Elia, C., Carnier, J., Bueno Jr, C. R., Campos, R. M. D. S., Sanches, P. D. L., Clemente, A. P. G., ... & Dâmaso, A. R. (2013). Effects of different physical exercises on leptin concentration in obese adolescents. *International journal of sports medicine*, 164-171.

Bharath, L. P., Choi, W. W., Cho, J. M., Skobodzinski, A. A., Wong, A., Sweeney, T. E., & Park, S. Y. (2018). Combined resistance and aerobic exercise training reduces insulin resistance and central adiposity in adolescent girls who are obese: randomized clinical trial. *European journal of applied physiology*, 118, 1653-1660.

de Mello, M. T., de Piano, A., Carnier, J., Sanches, P. D. L., Correa, F. A., Tock, L., ... & Damaso, A. R. (2011). Long-term effects of aerobic plus resistance training on the metabolic syndrome and adiponectinemia in obese adolescents. *The journal of clinical hypertension*, 13(5), 343-350.

Deldin, A., Kuk, J. L., & Lee, S. (2019). Influence of sex on the changes in regional fat and skeletal muscle mass in response to exercise training in adolescents with obesity. *Childhood obesity*, 15(3), 216-222.

Inoue, D. S., De Mello, M. T., Foschini, D., Lira, F. S., Ganen, A. D. P., Campos, R. M. D. S., ... & Dâmaso, A. R. (2015). Linear and undulating periodized strength plus

aerobic training promote similar benefits and lead to improvement of insulin resistance on obese adolescents. *Journal of Diabetes and its Complications*, 29(2), 258-264.

Tenório, T. R., Balagopal, P. B., Andersen, L. B., Ritti-Dias, R. M., Hill, J. O., Lofrano-Prado, M. C., & Prado, W. L. (2018). Effect of low-versus high-intensity exercise training on biomarkers of inflammation and endothelial dysfunction in adolescents with obesity: A 6-month randomized exercise intervention study. *Pediatric exercise science*, 30(1), 96-105.

Walsh, J. J., Bonafiglia, J. T., Goldfield, G. S., Sigal, R. J., Kenny, G. P., Doucette, S., ... & Gurd, B. J. (2020). Interindividual variability and individual responses to exercise training in adolescents with obesity. *Applied Physiology, Nutrition, and Metabolism*, 45(1), 45-54.

Walsh, J. J., D'Angiulli, A., Cameron, J. D., Sigal, R. J., Kenny, G. P., Holcik, M., ... & Goldfield, G. S. (2018). Changes in the Brain-Derived Neurotrophic Factor Are Associated with Improvements in Diabetes Risk Factors after Exercise Training in Adolescents with Obesity: The HEARTY Randomized Controlled Trial. *Neural Plasticity*, 2018, 7169583-7169583.

Wong, A., Sanchez-Gonzalez, M. A., Son, W. M., Kwak, Y. S., & Park, S. Y. (2018). The effects of a 12-week combined exercise training program on arterial stiffness, vasoactive substances, inflammatory markers, metabolic profile, and body composition in obese adolescent girls. *Pediatric Exercise Science*, 30(4), 480-486.



**Reason for exclusion: No information on the outcome of interest**

Abassi, W., Ouerghi, N., Nikolaidis, P. T., Hill, L., Racil, G., Knechtle, B., ... & Bouassida, A. (2022). Interval training with different intensities in overweight/obese adolescent females. *International Journal of Sports Medicine*, 43(05), 434-443.

Aguilar-Cordero, M. J., Rodríguez-Blanke, R., Leon-Ríos, X., Expósito Ruiz, M., García García, I., & Sánchez-López, A. M. (2020). Influence of physical activity on blood pressure in children with overweight/obesity: a randomized clinical trial. *American Journal of Hypertension*, 33(2), 131-136.

Alberga, A. S., Farnesi, B. C., Lafleche, A., Legault, L., & Komorowski, J. (2013). The effects of resistance exercise training on body composition and strength in obese prepubertal children. *The Physician and sports medicine*, 41(3), 103-109.

Alberga, A. S., Prud'Homme, D., Kenny, G. P., Goldfield, G. S., Hadjiyannakis, S., Gougeon, R., ... & Sigal, R. J. (2015). Effects of aerobic and resistance training on abdominal fat, apolipoproteins and high-sensitivity C-reactive protein in adolescents with obesity: the HEARTY randomized clinical trial. *International journal of obesity*, 39(10), 1494-1500.

Alberga, A. S., Prud'homme, D., Sigal, R. J., Goldfield, G. S., Hadjiyannakis, S., Phillips, P., ... & Kenny, G. P. (2016). Effects of aerobic training, resistance training, or both on cardiorespiratory and musculoskeletal fitness in adolescents with obesity: the HEARTY trial. *Applied physiology, nutrition, and metabolism*, 41(3), 255-265.

Alves, A. S. R., Venancio, T. L., Honorio, S. A. A., MARTINS, J., & Manuel, C. (2019). Multicomponent training with different frequencies on body composition and physical fitness in obese children. *Anais da Academia Brasileira de Ciências*, 91.

Barros, T. A., do Prado, W. L., Tenório, T. R., Ritti-Dias, R. M., Germano-Soares, A. H., Balagopal, B. P., ... & Freitas-Dias, R. (2021). Cardiovascular Effects of Aerobic Exercise With Self-Selected or Predetermined Intensity in Adolescents With Obesity. *Pediatric Exercise Science*, 33(3), 125-131.

Berntsen, S., Mowinckel, P., Carlsen, K. H., Lødrup Carlsen, K. C., Pollestad Kolsgaard, M. L., Joner, G., & Anderssen, S. A. (2010). Obese children playing towards an active lifestyle. *International Journal of Pediatric Obesity*, 5(1), 64-71.

Bouamra, M., Zouhal, H., Ratel, S., Makhoul, I., Bezrati, I., Chtara, M., ... & Chaouachi, A. (2022). Concurrent Training Promotes Greater Gains on Body Composition and Components of Physical Fitness Than Single-Mode Training (Endurance or Resistance) in Youth With Obesity. *Frontiers in Physiology*, 13, 1-16.

Carnier, J., de Mello, M. T., Ackel-DElia, C., Corgosinho, F. C., da Silveira Campos, R. M., de Lima Sanches, P., ... & Dâmaso, A. R. (2013). Aerobic training (AT) is more effective than aerobic plus resistance training (AT+ RT) to improve anorexigenic/orexigenic factors in obese adolescents. *Appetite*, 69, 168-173.

Chang, C., Liu, W., Zhao, X., Li, S., & Yu, C. (2008). Effect of supervised exercise intervention on metabolic risk factors and physical fitness in Chinese obese children in early puberty. *Obesity reviews*, 9, 135-141.

Chen, F. T., Chen, S. R., Chu, I. H., Liu, J. H., & Chang, Y. K. (2017). Multicomponent exercise intervention and metacognition in obese preadolescents: A randomized controlled study. *Journal of Sport and Exercise Psychology*, 39(4), 302-312.

Chen, S. R., Tseng, C. L., Kuo, S. Y., & Chang, Y. K. (2016). Effects of a physical activity intervention on autonomic and executive functions in obese young adolescents: A randomized controlled trial. *Health Psychology: Official Journal of the Division of Health Psychology, American Psychological Association*, 35(10), 1120-1125.

Chuensiri, N., Suksom, D., & Tanaka, H. (2018). Effects of high-intensity intermittent training on vascular function in obese preadolescent boys. *Childhood Obesity*, 14(1), 41-49.

Comeras-Chueca, C., Villalba-Heredia, L., Perez-Lasierra, J. L., Marín-Puyalto, J., Lozano-Berges, G., Matute-Llorente, Á., ... & Casajús, J. A. (2022). Active Video Games Improve Muscular Fitness and Motor Skills in Children with Overweight or Obesity. *International Journal of Environmental Research and Public Health*, 19(5), 2642.

Cvetković, N., Stojanović, E., Stojiljković, N., Nikolić, D., Scanlan, A. T., & Milanović, Z. (2018). Exercise training in overweight and obese children: Recreational

football and high-intensity interval training provide similar benefits to physical fitness. Scandinavian journal of medicine & science in sports, 28, 18-32.

Elloumi, M., Makni, E., Ounis, O. B., Moalla, W., Zbidi, A., Zaoueli, M., ... & Tabka, Z. (2011). Six-minute walking test and the assessment of cardiorespiratory responses during weight-loss programmes in obese children. *Physiotherapy Research International*, 16(1), 32-42.

Fazelifar, S., Ebrahim, K., & Sarkisian, V. (2013). Effect of concurrent training and detraining on anti-inflammatory biomarker and physical fitness levels in obese children. *Revista Brasileira de Medicina do Esporte*, 19, 349-354.

Goldfield, G. S., Kenny, G. P., Alberga, A. S., Prud'homme, D., Hadjiyannakis, S., Gougeon, R., ... & Sigal, R. J. (2015). Effects of aerobic training, resistance training, or both on psychological health in adolescents with obesity: The HEARTY randomized controlled trial. *Journal of consulting and clinical psychology*, 83(6), 1123.

Gutin, B., Barbeau, P., Owens, S., Lemmon, C. R., Bauman, M., Allison, J., ... & Litaker, M. S. (2002). Effects of exercise intensity on cardiovascular fitness, total body composition, and visceral adiposity of obese adolescents. *The American journal of clinical nutrition*, 75(5), 818-826.

Hagströmer, M., Elmberg, K., Mårild, S., & Sjöström, M. (2009). Participation in organized weekly physical exercise in obese adolescents reduced daily physical activity. *Acta paediatrica*, 98(2), 352-354.

Hao, M., Han, W., & Yamauchi, T. (2019). Short-term and long-term effects of a combined intervention of rope skipping and nutrition education for overweight children in Northeast China. *Asia Pacific Journal of Public Health*, 31(4), 348-358.

Hasson, R. E., Adam, T. C., Davis, J. N., Kelly, L. A., Ventura, E. E., Byrd-Williams, C. E., ... & Goran, M. I. (2012). Randomized controlled trial to improve adiposity, inflammation, and insulin resistance in obese African-American and Latino youth. *Obesity*, 20(4), 811-818.

Hay, J., Wittmeier, K., MacIntosh, A., Wicklow, B., Duhamel, T., Sellers, E., ... & McGavock, J. (2016). Physical activity intensity and type 2 diabetes risk in overweight youth: a randomized trial. *International Journal of Obesity*, 40(4), 607-614.

Herget, S., Reichardt, S., Grimm, A., Petroff, D., K apflinger, J., Haase, M., ... & Bl ucher, S. (2016). High-intensity interval training for overweight adolescents: Program acceptance of a media supported intervention and changes in body composition. *International journal of environmental research and public health*, 13(11), 1099.

Horner, K., Barinas-Mitchell, E., DeGross, C., Kuk, J. L., Drant, S., & Lee, S. (2015). Effect of aerobic versus resistance exercise on pulse wave velocity, intima media thickness and left ventricular mass in obese adolescents. *Pediatric exercise science*, 27(4), 494-502.

Ingul, C. B., Dias, K. A., Tjonna, A. E., Follstad, T., Hosseini, M. S., Timilsina, A. S., ... & Coombes, J. S. (2018). Effect of high intensity interval training on cardiac function

in children with obesity: a randomised controlled trial. *Progress in cardiovascular diseases*, 61(2), 214-221.

Julian, V., Costa, D., O'malley, G., Metz, L., Fillon, A., Miguet, M., ... & Thivel, D. (2022). Bone Response to High-Intensity Interval Training versus Moderate-Intensity Continuous Training in Adolescents with Obesity. *Obesity Facts*, 15(1), 46-54.

Kondiboyina, V., Raine, L. B., Kramer, A. F., Khan, N. A., Hillman, C. H., & Shefelbine, S. J. (2020). Skeletal Effects of Nine Months of Physical Activity in Obese and Healthy-weight Children. *Medicine and science in sports and exercise*, 52(2), 434.

Koubaa, A., Trabelsi, H., Masmoudi, L., Elloumi, M., Sahnoun, Z., Zeghal, K. M., & Hakim, A. (2013). Effect of intermittent and continuous training on body composition cardiorespiratory fitness and lipid profile in obese adolescents. *IOSR-JPBS*, 3(2), 31-7.

Lau, P. W., Wong, D. P., Ngo, J. K., Liang, Y., Kim, C. G., & Kim, H. S. (2015). Effects of high-intensity intermittent running exercise in overweight children. *European journal of sport science*, 15(2), 182-190.

Lazzer, S., Tringali, G., Caccavale, M., De Micheli, R., Abbruzzese, L., & Sartorio, A. (2017). Effects of high-intensity interval training on physical capacities and substrate oxidation rate in obese adolescents. *Journal of endocrinological investigation*, 40, 217-226.

Leandro, C. G., Brinco, R. A., Nobre, G. G., Nobre, I. G., Silva-Santiago, L. C., Aires-Dos-Santos, B. R., ... & Moura-Dos-Santos, M. A. (2021). Post-exercise hypotension effects in response to plyometric training of 7-to 9-year-old boys with overweight/obesity: a randomized controlled study. *The Journal of Sports Medicine and Physical Fitness*, 61(9), 1281-1289.

Lee, S., Libman, I., Hugan, K. S., Kuk, J. L., Barinas-Mitchell, E., Chung, H., & Arslanian, S. (2020). Effects of exercise modality on body composition and cardiovascular disease risk factors in adolescents with obesity: a randomized clinical trial. *Applied Physiology, Nutrition, and Metabolism*, 45(12), 1377-1386.

Lee, Y. H., Song, Y. W., Kim, H. S., Lee, S. Y., Jeong, H. S., Suh, S. H., ... & Hong, Y. M. (2010). The effects of an exercise program on anthropometric, metabolic, and cardiovascular parameters in obese children. *Korean circulation journal*, 40(4), 179-184.

Leite, N., Carvalho, H. M., Padez, C., Lopes, W. A., Milano, G. E., Radominski, R. B., & Coelho-e-Silva, M. J. (2013). Age and menarcheal status do not influence metabolic response to aerobic training in overweight girls. *Diabetology & Metabolic Syndrome*, 5(1), 1-9.

Li, C., Lyu, S., & Zhang, J. (2022). Effects of Aerobic Exercise on the Serum Leptin Level and Heart Rate Variability in the Obese Girl Children. *Computational Intelligence and Neuroscience*, 2022, 2298994-2298994.

Likhitweerawong, N., Boonchooduang, N., Kittisakmontri, K., Chonchaiya, W., & Louthrenoo, O. (2021). Effectiveness of mobile application on changing weight, healthy eating habits, and quality of life in children and adolescents with obesity: a randomized controlled trial. *BMC pediatrics*, 21(1), 1-9.

Lisón, J. F., Real-Montes, J. M., Torró, I., Arguisuelas, M. D., Álvarez-Pitti, J., Martínez-Gramage, J., ... & Lurbe, E. (2012). Exercise intervention in childhood obesity: a randomized controlled trial comparing hospital-versus home-based groups. *Academic pediatrics*, 12(4), 319-325.

Mabli, J., Bleeker, M., Fox, M. K., Jean-Louis, B., & Fox, M. (2020). Randomized controlled trial of healthy Harlem's get fit program: an after-school intervention for childhood overweight and obesity in the Harlem Children's zone. *Childhood Obesity*, 16(7), 479-487.

Maddison, R., Foley, L., Ni Mhurchu, C., Jiang, Y., Jull, A., Prapavessis, H., ... & Rodgers, A. (2011). Effects of active video games on body composition: a randomized controlled trial. *The American journal of clinical nutrition*, 94(1), 156-163.

McNarry, M. A., Lambrick, D., Westrupp, N., & Faulkner, J. (2015). The influence of a six-week, high-intensity games intervention on the pulmonary oxygen uptake kinetics in prepubertal obese and normal-weight children. *Applied Physiology, Nutrition, and Metabolism*, 40(10), 1012-1018.



Medrano, M., Arenaza, L., Ramírez-Vélez, R., Ortega, F. B., Ruiz, J. R., & Labayen, I. (2020). Prevalence of responders for hepatic fat, adiposity and liver enzyme levels in response to a lifestyle intervention in children with overweight/obesity: EFIGRO randomized controlled trial. *Pediatric Diabetes*, 21(2), 215-223.

Mendonça, F. R., de Faria, W. F., da Silva, J. M., Massuto, R. B., Dos Santos, G. C., Correa, R. C., ... & Neto, A. S. (2022). Effects of aerobic exercise combined with resistance training on health-related physical fitness in adolescents: A randomized controlled trial. *Journal of exercise science and fitness*, 20(2), 182-189.

Mitchell, B. M., Gutin, B., Kapuku, G., Barbeau, P., Humphries, M. C., Owens, S., ... & Allison, J. (2002). Left Ventricular Structure and Function in Obese Adolescents: Relations to Cardiovascular Fitness, Percent Body Fat, and Visceral Adiposity, and Effects of Physical Training. *Pediatrics*, 109(5), e73.

Monteiro, P. A., Chen, K. Y., Lira, F. S., Saraiva, B. T. C., Antunes, B. M. M., Campos, E. Z., & Freitas, I. F. (2015). Concurrent and aerobic exercise training promote similar benefits in body composition and metabolic profiles in obese adolescents. *Lipids in health and disease*, 14, 1-9.

Nobre, G. G., de Almeida, M. B., Nobre, I. G., Dos Santos, F. K., Brinco, R. A., Arruda-Lima, T. R., ... & Moura-dos-Santos, M. A. (2017). Twelve weeks of plyometric training improves motor performance of 7-to 9-year-old boys who were overweight/obese: A randomized controlled intervention. *The journal of strength & conditioning research*, 31(8), 2091-2099.

Nobre, G., Silva-Santiago, L. C., Aires-Dos-Santos, B. R., Marinho-Dos-Santos, R., Rodrigues-Ribeiro, M., Marinho-Barros, M. R., ... & Moura-Dos-Santos, M. A. (2021). Post-exercise hypotension effects in response to plyometric training of 7-to 9-year-old boys with overweight/obesity: a randomized controlled study. *The Journal of Sports Medicine and Physical Fitness*, 61(9), 1281-1289.

Nunes, J. E. D., Cunha, H. S., Freitas, Z. R., Nogueira, A. M. C., Dâmaso, A. R., Espindola, F. S., & Cheik, N. C. (2016). Interdisciplinary therapy changes superoxide dismutase activity and adiponectin in obese adolescents: a randomised controlled trial. *Journal of Sports Sciences*, 34(10), 945-950.

Ounis, O. B., Elloumi, M., Zouhal, H., Makni, E., Zaouali, M., Lac, G., ... & Amri, M. (2011). Effect of an individualized physical training program on cortisol and growth hormone levels in obese children. *Ann. Endocrinol.*, 72(1), 34-41.

Owens, S., Gutin, B., Allison, J., Riggs, S. H. A. R. O. N., Ferguson, M., Litaker, M. A. R. K., & Thompson, W. I. L. L. I. A. M. (1999). Effect of physical training on total and visceral fat in obese children. *Medicine and science in sports and exercise*, 31(1), 143-148.

Paahoo, A., Tadibi, V., & Behpoor, N. (2021). Effectiveness of continuous aerobic versus high-intensity interval training on atherosclerotic and inflammatory markers in boys with overweight/obesity. *Pediatric Exercise Science*, 33(3), 132-138.

Ramírez-Vélez, R., García-Hermoso, A., Correa-Rodríguez, M., Fernández-Irigoyen, J., Palomino-Echeverría, S., Santamaría, E., ... & Izquierdo, M. (2022). Effects of Different Doses of Exercise on Inflammation Markers Among Adolescents With Overweight/Obesity: HEPAFIT Study. *The Journal of Clinical Endocrinology & Metabolism*, 107(6), e2619-e2627.

Rey, O., Vallier, J. M., Nicol, C., Mercier, C. S., & Maïano, C. (2017). Effects of combined vigorous interval training program and diet on body composition, physical fitness, and physical self-perceptions among obese adolescent boys and girls. *Pediatric exercise science*, 29(1), 73-83.

Roh, H. T., Cho, S. Y., & So, W. Y. (2020). Effects of Regular Taekwondo Intervention on Oxidative Stress Biomarkers and Myokines in Overweight and Obese Adolescents. *International Journal of Environmental Research and Public Health*, 17(7).

Sánchez-López, A. M., Menor-Rodríguez, M. J., Sánchez-García, J. C., & Aguilar-Cordero, M. J. (2020). Play as a method to reduce overweight and obesity in children: an RCT. *International journal of environmental research and public health*, 17(1), 346.

Saygın, O. Z., & Öztürk, M. A. (2011). The effect of twelve week aerobic exercise programme on health related physical fitness components and blood lipids in obese girls. *African Journal of Pharmacy and Pharmacology*, 5(12), 1441-1445.

Schranz, N., Tomkinson, G., Parletta, N., Petkov, J., & Olds, T. (2014). Can resistance training change the strength, body composition and self-concept of overweight and obese adolescent males? A randomised controlled trial. *British journal of sports medicine*, 48(20), 1482-1488.

Shokri, E., Heidarianpour, A., & Razavi, Z. (2021). Positive effect of combined exercise on adipokines levels and pubertal signs in overweight and obese girls with central precocious puberty. *Lipids in Health and Disease*, 20(1), 1-14.

Sigal, R. J., Alberga, A. S., Goldfield, G. S., Prud'homme, D., Hadjiyannakis, S., Gougeon, R., ... & Kenny, G. P. (2014). Effects of aerobic training, resistance training, or both on percentage body fat and cardiometabolic risk markers in obese adolescents: the healthy eating aerobic and resistance training in youth randomized clinical trial. *JAMA pediatrics*, 168(11), 1006-1014.

Song, J. K., Stebbins, C. L., Kim, T. K., Kim, H. B., Kang, H. J., & Chai, J. H. (2012). Effects of 12 weeks of aerobic exercise on body composition and vascular compliance in obese boys. *J Sports Med Phys Fitness*, 52(5), 522-529.

Starkoff, B. E., Eneli, I. U., Bonny, A. E., Hoffman, R. P., & Devor, S. T. (2014). Estimated aerobic capacity changes in adolescents with obesity following high intensity interval exercise. *International Journal of Kinesiology and Sports Science*, 2(3), 1-8.

Tan, S., Yang, C., & Wang, J. (2010). Physical training of 9-to 10-year-old children with obesity to lactate threshold intensity. *Pediatric exercise science*, 22(3), 477-485.

Thivel, D., Isacco, L., Lazaar, N., Aucouturier, J., Ratel, S., Doré, E., ... & Duché, P. (2011). Effect of a 6-month school-based physical activity program on body composition and physical fitness in lean and obese schoolchildren. *European journal of pediatrics*, 170, 1435-1443.

Williams, C. F., Bustamante, E. E., Waller, J. L., & Davis, C. L. (2019). Exercise effects on quality of life, mood, and self-worth in overweight children: the SMART randomized controlled trial. *Translational behavioral medicine*, 9(3), 451-459.

Yetgin, M. K., Agopyan, A., Kucukler, F. K., Gedikbasi, A., Yetgin, S., Kayapinar, F. C., ... & Cotuk, H. B. (2018). The influence of physical training modalities on basal metabolic rate and leptin on obese adolescent boys. *J Pak Med Assoc*, 68(6), 929-31.

Youssef, H., Groussard, C., Lemoine-Morel, S., Jacob, C., Moussa, E., Fazah, A., ... & Delamarche, A. (2015). Aerobic training suppresses exercise-induced lipid peroxidation and inflammation in overweight/obese adolescent girls. *Pediatric exercise science*, 27(1), 67-76.

### **Reason for exclusion: Inappropriate intervention**

Balagopal, P., George, D., Yarandi, H., Funanage, V., & Bayne, E. (2005). Reversal of obesity-related hypoadiponectinemia by lifestyle intervention: a controlled, randomized study in obese adolescents. *The Journal of Clinical Endocrinology & Metabolism*, 90(11), 6192-6197.

Balagopal, P., Gidding, S. S., Buckloh, L. M., Yarandi, H. N., Sylvester, J. E., George, D. E., & Funanage, V. L. (2010). Changes in circulating satiety hormones in obese children: a randomized controlled physical activity-based intervention study. *Obesity*, 18(9), 1747-1753.

Broadney, M. M., Belcher, B. R., Berrigan, D. A., Brychta, R. J., Tigner Jr, I. L., Shareef, F., ... & Yanovski, J. A. (2018). Effects of interrupting sedentary behavior with short bouts of moderate physical activity on glucose tolerance in children with overweight and obesity: a randomized crossover trial. *Diabetes care*, 41(10), 2220-2228.

Davis, J. N., Tung, A., Chak, S. S., Ventura, E. E., Byrd-Williams, C. E., & Alexander, K. E. (2009). Aerobic and Strength Training Reduces Adiposity in Overweight Latina Adolescents. *Medicine and science in sports and exercise*, 41(7), 1494-1503.

de Piano, A., de Mello, M. T., Sanches, P. D. L., da Silva, P. L., Campos, R. M., Carnier, J., ... & Dâmaso, A. R. (2012). Long-term effects of aerobic plus resistance training on the adipokines and neuropeptides in nonalcoholic fatty liver disease obese adolescents. *European journal of gastroenterology & hepatology*, 24(11), 1313-1324.

Erceg, D. N., Anderson, L. J., Nickles, C. M., Lane, C. J., Weigensberg, M. J., & Schroeder, E. T. (2015). Changes in Bone Biomarkers, BMC, and Insulin Resistance Following a 10-Week Whole Body Vibration Exercise Program in Overweight Latino Boys. *International Journal of Medical Sciences*, 12(6), 494-501.

Goldfield, G. S., Kenny, G. P., Prud'homme, D., Holcik, M., Alberga, A. S., Fahnestock, M., ... & Sigal, R. J. (2018). Effects of aerobic training, resistance training, or both on brain-derived neurotrophic factor in adolescents with obesity: The hearty randomized controlled trial. *Physiology & behavior*, 191, 138-145.

Kelly, L., Holmberg, P. M., Schroeder, E. T., Loza, A., Lin, X., Moody, A., ... & Kirk, A. (2019). Effect of home-based strength training program on IGF-I, IGFBP-1 and IGFBP-3 in obese Latino boys participating in a 16-week randomized controlled trial. *Journal of Pediatric Endocrinology and Metabolism*, 32(10), 1121-1129.

Kim, H. J., Tak, Y. J., Lee, S. Y., & Seo, J. P. (2022). Effects of a 12-Week Diet versus Diet plus Aerobic and Resistance Exercise Program on Acylated and Desacylated Ghrelin, and Ghrelin O-Acyltransferase in Adolescent Girls with Obesity. *International Journal of Environmental Research and Public Health*, 19(3), 1480.

Morrissey, C., Montero, D., Raverdy, C., Masson, D., Amiot, M. J., & Vinet, A. (2018). Effects of exercise intensity on microvascular function in obese adolescents. *International journal of sports medicine*, 39(06), 450-455.

Plavsic, L., Knezevic, O. M., Sovtic, A., Minic, P., Vukovic, R., Mazibrada, I., ... & Macut, D. (2020). Effects of high-intensity interval training and nutrition advice on cardiometabolic markers and aerobic fitness in adolescent girls with obesity. *Applied Physiology, Nutrition, and Metabolism*, 45(3), 294-300.

Staiano, A. E., Beyl, R. A., Guan, W., Hendrick, C. A., Hsia, D. S., & Newton, R. L. (2018). Home-based exergaming among children with overweight and obesity: A randomized clinical trial. *Pediatric obesity*, 13(11), 724-733.

Suh, S., Jeong, I. K., Kim, M. Y., Kim, Y. S., Shin, S., Kim, S. S., & Kim, J. H. (2011). Effects of resistance training and aerobic exercise on insulin sensitivity in overweight Korean adolescents: a controlled randomized trial. *Diabetes & Metabolism Journal*, 35(4), 418-426.

**Reason for exclusion: Inappropriate study design**

Bell, L. M., Watts, K., Siafarikas, A., Thompson, A., Ratnam, N., Bulsara, M., ... & Davis, E. A. (2007). Exercise alone reduces insulin resistance in obese children independently of changes in body composition. *The Journal of Clinical Endocrinology & Metabolism*, 92(11), 4230-4235.

De Groote, E., Britto, F. A., Bullock, L., François, M., De Buck, C., Nielens, H., & Deldicque, L. (2018). Hypoxic training improves normoxic glucose tolerance in adolescents with obesity. *Med Sci Sports Exerc*, 50(11), 2200-2208.

Espinoza-Silva, M., Latorre-Román, P. Á., Párraga-Montilla, J., Caamaño-Navarrete, F., Jerez-Mayorga, D., & Delgado-Floody, P. (2019). Response of obese schoolchildren to high-intensity interval training applied in the school context. *Endocrinología, Diabetes y Nutrición*, 66(10), 611-619.



Labayen, I., Medrano, M., Arenaza, L., Maíz, E., Osés, M., Martínez-Vizcaíno, V., ... & Ortega, F. B. (2020). Effects of exercise in addition to a family-based lifestyle intervention program on hepatic fat in children with overweight. *Diabetes Care*, 43(2), 306-313.

Lopes, W. A., Leite, N., da Silva, L. R., Brunelli, D. T., Gáspari, A. F., Radominski, R. B., ... & Cavaglieri, C. R. (2016). Effects of 12 weeks of combined training without caloric restriction on inflammatory markers in overweight girls. *Journal of sports sciences*, 34(20), 1902-1912.

Nascimento, H., Alves, A. I., Medeiros, A. F., Coimbra, S., Catarino, C., Bronze-da-Rocha, E., ... & Belo, L. (2016). Impact of a School-Based Intervention Protocol-ACORDA Project-On Adipokines in An Overweight and Obese Pediatric Population. *Pediatric exercise science*, 28(3), 407-416.

Pizzi, J., Furtado-Alle, L., Schiavoni, D., Lopes, W. A., da Rosa Silva, L., Bono, G. F., ... & Leite, N. (2017). Reduction in Butyrylcholinesterase Activity and Cardiovascular Risk Factors in Obese Adolescents after 12-Weeks of High-Intensity Interval Training. *Journal of Exercise Physiology Online*, 20(3).

Tsang, T. W., Kohn, M., Chow, C. M., & Singh, M. F. (2009). A randomized controlled trial of Kung Fu training for metabolic health in overweight/obese adolescents: the "martial fitness" study. *Journal of Pediatric Endocrinology and Metabolism*, 22(7), 595-608.

Watts, K., Beye, P., Siafarikas, A., Davis, E. A., Jones, T. W., O'Driscoll, G., & Green, D. J. (2004). Exercise training normalizes vascular dysfunction and improves central adiposity in obese adolescents. *Journal of the American College of Cardiology*, 43(10), 1823-1827.

**Reason for exclusion: Inappropriate population**

Chew, C. S. E., Oh, J. Y., Rajasegaran, K., Saffari, S. E., Lim, C. M. M., Lim, S. C., ... & Kelly, S. (2019). Evaluation of a group family-based intervention programme for adolescent obesity: the LITE randomised controlled pilot trial. *Singapore Medical Journal*, 62(1), 39-47.

Di Maglie, A., Marsigliante, S., My, G., Colazzo, S., & Muscella, A. (2022). Effects of a physical activity intervention on schoolchildren fitness. *Physiological Reports*, 10(2), e15115-e15115.

Kranen, S. H., Oliveira, R. S., Bond, B., Williams, C. A., & Barker, A. R. (2023). The effect of 4 weeks of high-intensity interval training and 2 weeks of detraining on cardiovascular disease risk factors in male adolescents. *Experimental physiology*, 108(4), 595-606.

Martin, R., Buchan, D. S., Baker, J. S., Young, J., Sculthorpe, N., & Grace, F. M. (2015). Sprint interval training (SIT) is an effective method to maintain cardiorespiratory fitness (CRF) and glucose homeostasis in Scottish adolescents. *Biology of sport*, 32(4), 307-313.

Telford, R. D., Cunningham, R. B., Telford, R. M., Daly, R. M., Olive, L. S., & Abhayaratna, W. P. (2013). Physical education can improve insulin resistance: the LOOK randomized cluster trial. *Med Sci Sports Exerc*, 45(10), 1956-64.

Varagiannis, P., Magriplis, E., Risvas, G., Vamvouka, K., Nisianaki, A., Papageorgiou, A., ... & Zampelas, A. (2021). Effects of Three Different Family-Based Interventions in Overweight and Obese Children: The "4 Your Family" Randomized Controlled Trial. *Nutrients*, 13(2), 341-341.

**Reason for exclusion: Not enough information on the type of exercise**

van der Baan-Slootweg, O., Benninga, M. A., Beelen, A., van der Palen, J., Tamminga-Smeulders, C., Tijssen, J. G., & van Aalderen, W. M. (2014). Inpatient treatment of children and adolescents with severe obesity in the Netherlands: a randomized clinical trial. *JAMA pediatrics*, 168(9), 807-814.

**eTable 2.** Results of the Cochrane Risk-of-Bias Tool for Randomized Controlled Trials (RoB-2)

All studies were deemed to be at low risk of bias for the "randomization process" domain since we only included randomized studies. Inversely, the domain "Deviations from intended interventions" was rated to be at high risk of bias in all studies due to the impossibility of blinding participants and people delivering the intervention to group assignment in the exercise interventions. For the rest of the items, most studies were considered to have some concerns regarding risk of bias.

| Study                                      | Randomization process | Deviations from intended interventions | Missing outcome data | Measurement of the outcome | Selective reporting | Overall       |
|--------------------------------------------|-----------------------|----------------------------------------|----------------------|----------------------------|---------------------|---------------|
| Ben Ounis et al. (2010) <sup>1</sup>       | Low                   | High                                   | Low                  | Some concerns              | Some concerns       | Some concerns |
| Benson et al. (2008) <sup>2</sup>          | Low                   | High                                   | High                 | Some concerns              | Some concerns       | High          |
| Campos et al. (2014) <sup>3</sup>          | Low                   | High                                   | High                 | Some concerns              | Some concerns       | High          |
| Carrel et al. (2005) <sup>4</sup>          | Low                   | High                                   | Some concerns        | Some concerns              | Some concerns       | Some concerns |
| Chae et al. (2010) <sup>5</sup>            | Low                   | High                                   | Low                  | Some concerns              | Some concerns       | Some concerns |
| Corte-de-Araujo et al. (2012) <sup>6</sup> | Low                   | High                                   | High                 | Some concerns              | Some concerns       | High          |
| Damaso et al. (2014) <sup>7</sup>          | Low                   | High                                   | Some concerns        | Some concerns              | Some concerns       | Some concerns |
| Davis et al. (2020) <sup>8</sup>           | Low                   | High                                   | High                 | Some concerns              | Some concerns       | High          |
| Davis et al. (2011) <sup>9</sup>           | Low                   | High                                   | High                 | Some concerns              | Some concerns       | High          |
| Davis et al. (2012) <sup>10</sup>          | Low                   | High                                   | Some concerns        | Low                        | Low                 | Low           |
| de Lira et al. (2017) <sup>11</sup>        | Low                   | High                                   | Some concerns        | Some concerns              | Some concerns       | Some concerns |
| de Souza et al. (2022) <sup>12</sup>       | Low                   | High                                   | High                 | Some concerns              | Some concerns       | High          |

|                                                                            |     |      |               |               |               |               |
|----------------------------------------------------------------------------|-----|------|---------------|---------------|---------------|---------------|
| Dias et al. (2018) <sup>13</sup>                                           | Low | High | High          | Some concerns | Some concerns | High          |
| Farah et al. (2013) <sup>14</sup><br>and Silva et al. (2015) <sup>15</sup> | Low | High | High          | Some concerns | Some concerns | High          |
| Faria et al. (2020) <sup>16</sup>                                          | Low | High | Some concerns | Some concerns | Some concerns | Some concerns |
| Farpour-Lambert et al. (2009) <sup>17</sup>                                | Low | High | Low           | Low           | Low           | Low           |
| Ferguson et al. (1999) <sup>18</sup>                                       | Low | High | Low           | Some concerns | Some concerns | Some concerns |
| Ghorbanian et al. (2013) <sup>19</sup>                                     | Low | High | Some concerns | Some concerns | Some concerns | Some concerns |
| González-Ruiz et al. (2021) <sup>20</sup>                                  | Low | High | Some concerns | Some concerns | Some concerns | Some concerns |
| Grace et al. (2021) <sup>21</sup>                                          | Low | High | High          | Some concerns | Some concerns | High          |
| Jeon et al. (2013) <sup>22</sup>                                           | Low | High | Some concerns | Some concerns | Some concerns | Some concerns |
| Kang et al. (2002) <sup>23</sup>                                           | Low | High | Some concerns | Some concerns | Some concerns | Some concerns |
| Karacabey et al. (2009) <sup>24</sup>                                      | Low | High | Some concerns | Some concerns | Some concerns | Some concerns |
| Kelly et al. (2004) <sup>25</sup>                                          | Low | High | Low           | Some concerns | Some concerns | Some concerns |
| Kim et al. (2007) <sup>26</sup>                                            | Low | High | Low           | Some concerns | Some concerns | Some concerns |
| Kim et al. (2020) <sup>27</sup>                                            | Low | High | Low           | Some concerns | Some concerns | Some concerns |
| Koot et al. (2016) <sup>28</sup>                                           | Low | High | High          | Some concerns | Some concerns | High          |
| Lee et al. (2013) <sup>29</sup>                                            | Low | High | Low           | Some concerns | Some concerns | Some concerns |
| Lee et al. (2019) <sup>30</sup>                                            | Low | High | High          | Some concerns | Some concerns | High          |
| Lee et al. (2010) <sup>31</sup>                                            | Low | High | Low           | Some concerns | Some concerns | Some concerns |
| Lee et al. (2012) <sup>32</sup>                                            | Low | High | Low           | Some concerns | Some concerns | Some concerns |
| Leite et al. (2022) <sup>33</sup>                                          | Low | High | High          | Some concerns | Some concerns | High          |
| McCormack et al. (2014) <sup>34</sup>                                      | Low | High | Low           | Some concerns | Some concerns | Some concerns |
| Meng et al. (2022) <sup>35</sup>                                           | Low | High | Some concerns | Some concerns | Some concerns | Some concerns |
| Meyer et al. (2006) <sup>36</sup>                                          | Low | High | Low           | Some concerns | Some concerns | Some concerns |

|                                             |     |      |               |               |               |               |
|---------------------------------------------|-----|------|---------------|---------------|---------------|---------------|
| Murphy et al. (2009) <sup>37</sup>          | Low | High | Low           | Some concerns | Some concerns | Some concerns |
| Park et al. (2012) <sup>38</sup>            | Low | High | Low           | Some concerns | Some concerns | Some concerns |
| Racil et al. (2016) <sup>39</sup>           | Low | High | Some concerns | Some concerns | Some concerns | Some concerns |
| Racil et al. (2013) <sup>40</sup>           | Low | High | Low           | Some concerns | Some concerns | Some concerns |
| Ramezani et al. (2017) <sup>41</sup>        | Low | High | Low           | Some concerns | Some concerns | Some concerns |
| Rasooli et al. (2021) <sup>42</sup>         | Low | High | Some concerns | Some concerns | Some concerns | Some concerns |
| Rosenbaum et al. (2007) <sup>43</sup>       | Low | High | High          | Some concerns | Some concerns | High          |
| Salahshornezhad et al. (2022) <sup>44</sup> | Low | High | Low           | Some concerns | Some concerns | Some concerns |
| Savoie et al. (2014) <sup>45</sup>          | Low | High | High          | Some concerns | Some concerns | Some concerns |
| Seo et al. (2019) <sup>46</sup>             | Low | High | High          | Some concerns | Some concerns | High          |
| Shaibi et al. (2006) <sup>47</sup>          | Low | High | Low           | Some concerns | Some concerns | Some concerns |
| Son et al. (2017) <sup>48</sup>             | Low | High | Low           | Some concerns | Some concerns | Some concerns |
| Sun et al. (2011) <sup>49</sup>             | Low | High | Low           | Some concerns | Some concerns | Some concerns |
| TjØnna et al. (2009) <sup>50</sup>          | Low | High | Some concerns | Some concerns | Some concerns | Some concerns |
| Vasconcellos et al. (2016) <sup>51</sup>    | Low | High | Low           | Low           | Low           | Low           |
| Wong et al. (2008) <sup>52</sup>            | Low | High | Low           | Some concerns | Some concerns | Some concerns |
| Wong et al. (2018) <sup>53</sup>            | Low | High | Low           | Some concerns | Some concerns | Some concerns |
| Yetgin et al. (2020) <sup>54</sup>          | Low | High | Low           | Some concerns | Some concerns | Some concerns |
| Zehsaz et al. (2016) <sup>55</sup>          | Low | High | Low           | Some concerns | Some concerns | Some concerns |

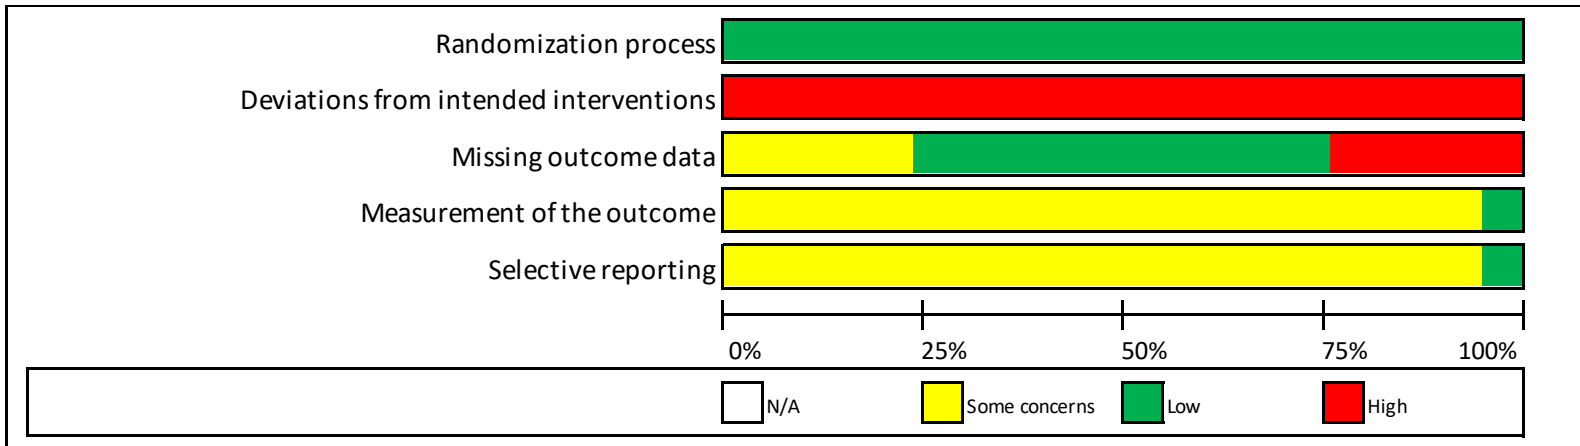

**eFigure 1. Effect of Exercise Programs on Fasting Insulin in Children and Adolescents With Excess Weight**

AT, aerobic training; CT, concurrent training; HIIT, high-intensity interval training; HIIT+RT, high-intensity interval training and resistance training; RT, resistance training.

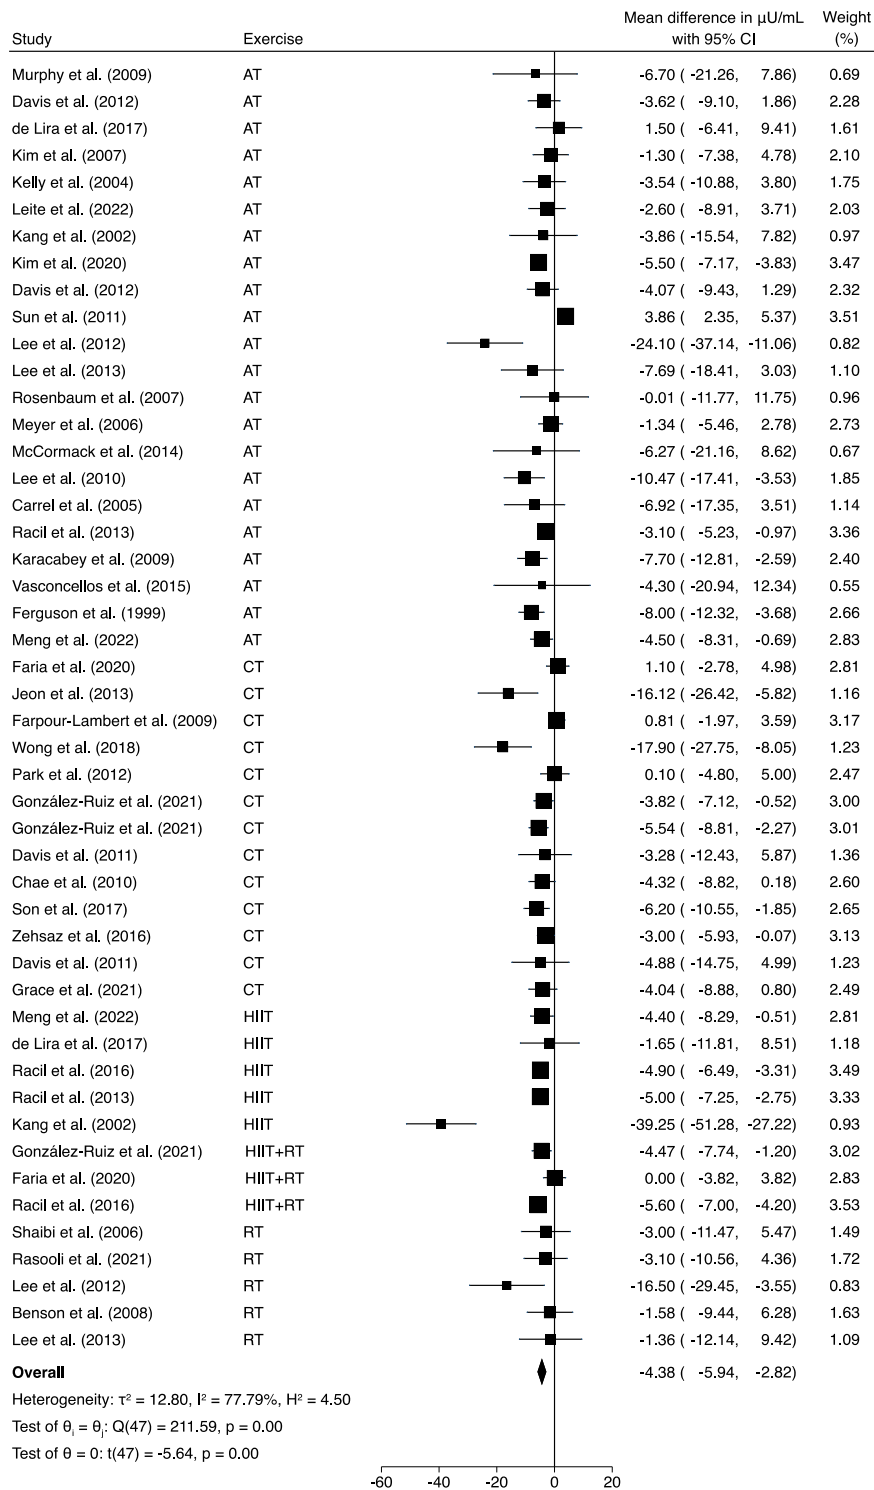



**Figure 2.** Effect of Exercise Programs on Homeostatic Model Assessment for Insulin Resistance (HOMA-IR) in Children and Adolescents With Excess Weight

AT, aerobic training; CT, concurrent training; HIIT, high-intensity interval training; HIIT+RT, high-intensity interval training and resistance training; RT, resistance training.

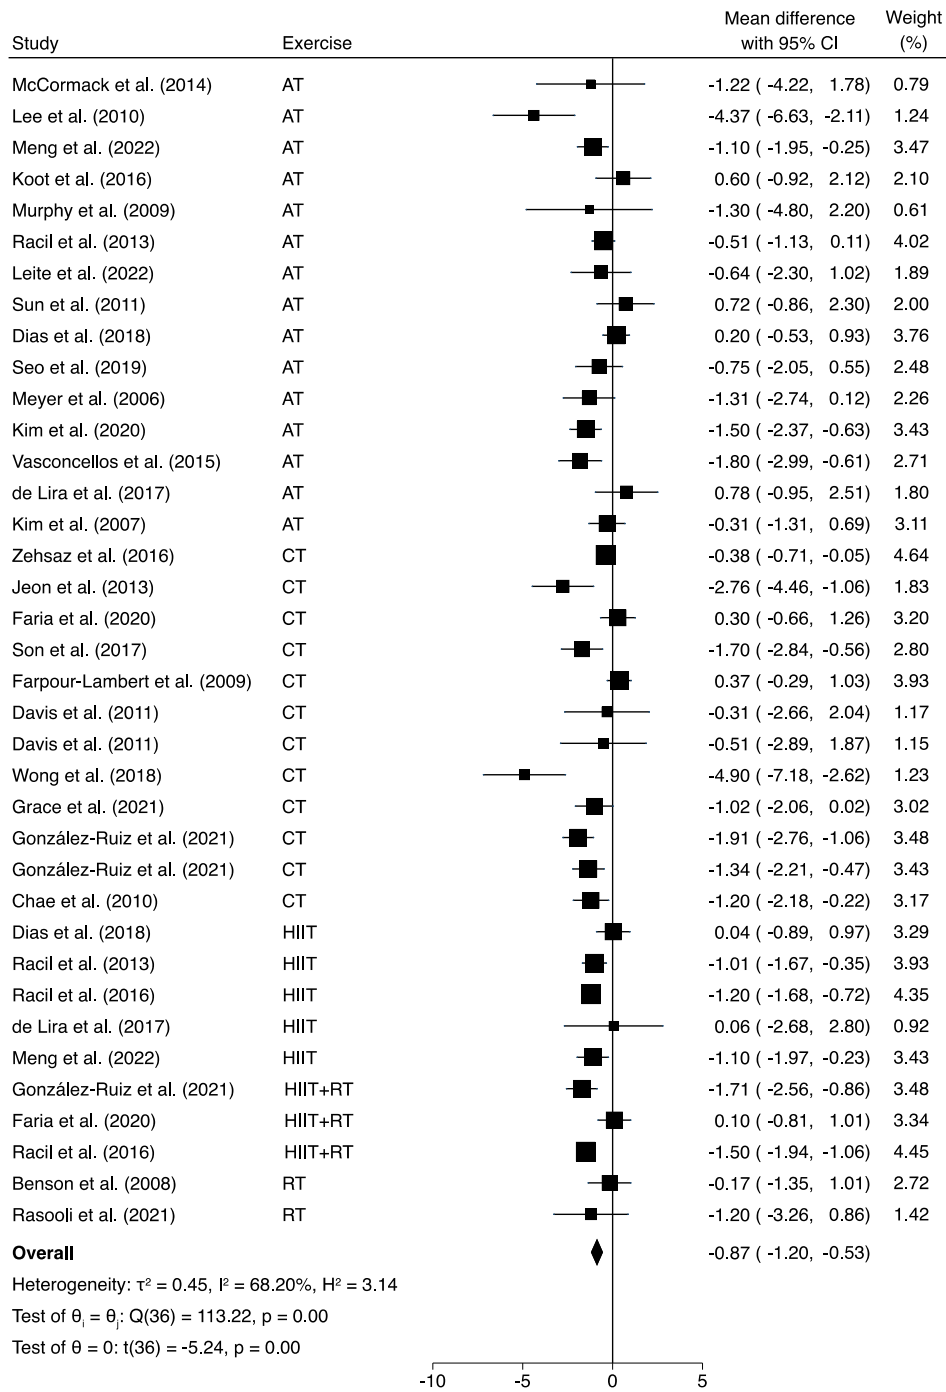

### eFigure 3. Effect of Exercise Programs on Fasting Glucose in Children and Adolescents With Excess Weight

AT, aerobic training; CT, concurrent training; HIIT, high-intensity interval training;

HIIT+RT, high-intensity interval training and resistance training; RT, resistance

training.

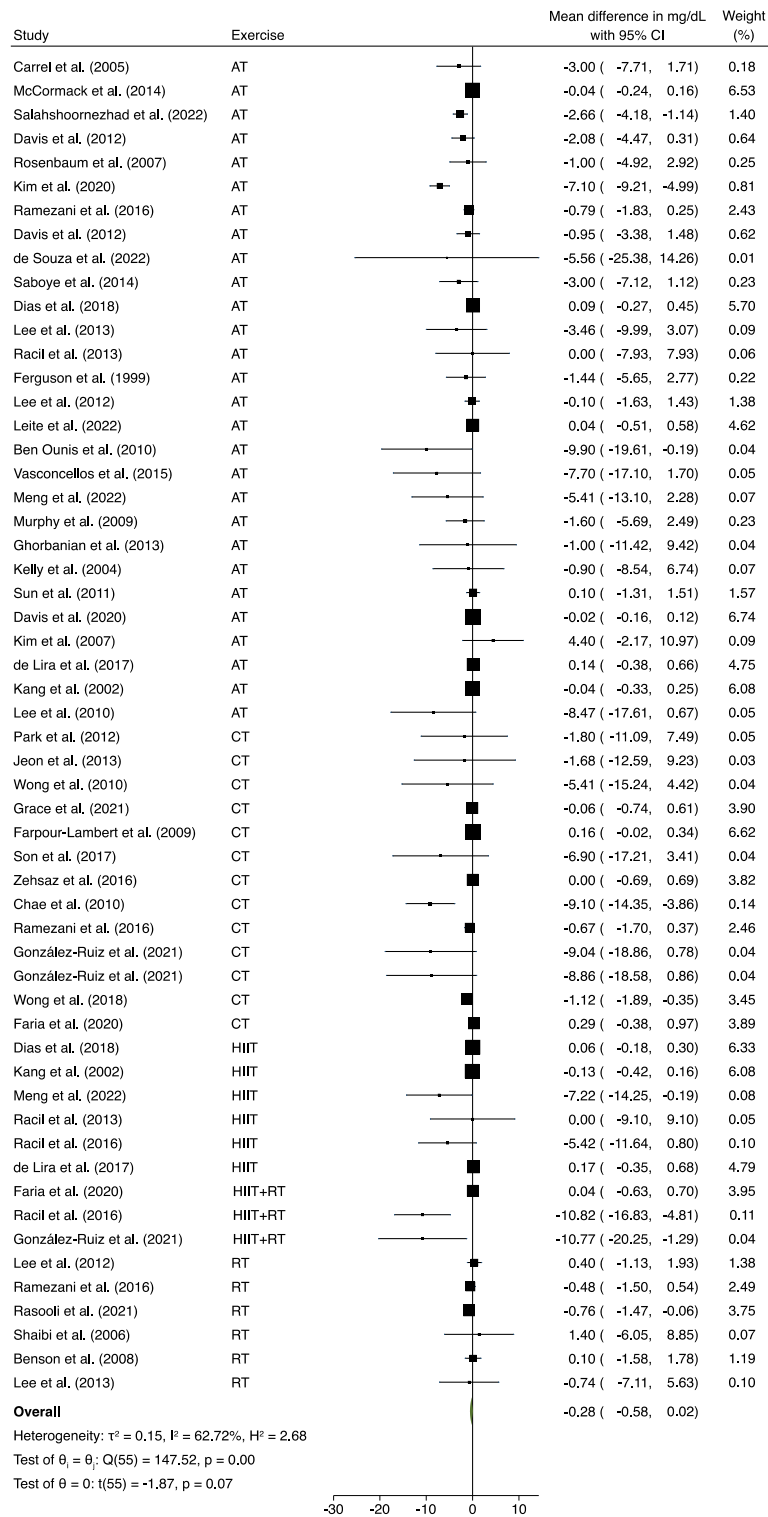

**eFigure 4.** Effect of Exercise Programs on 2-Hour Oral Glucose Tolerance in Children and Adolescents With Excess Weight

AT, aerobic training; RT, resistance training.

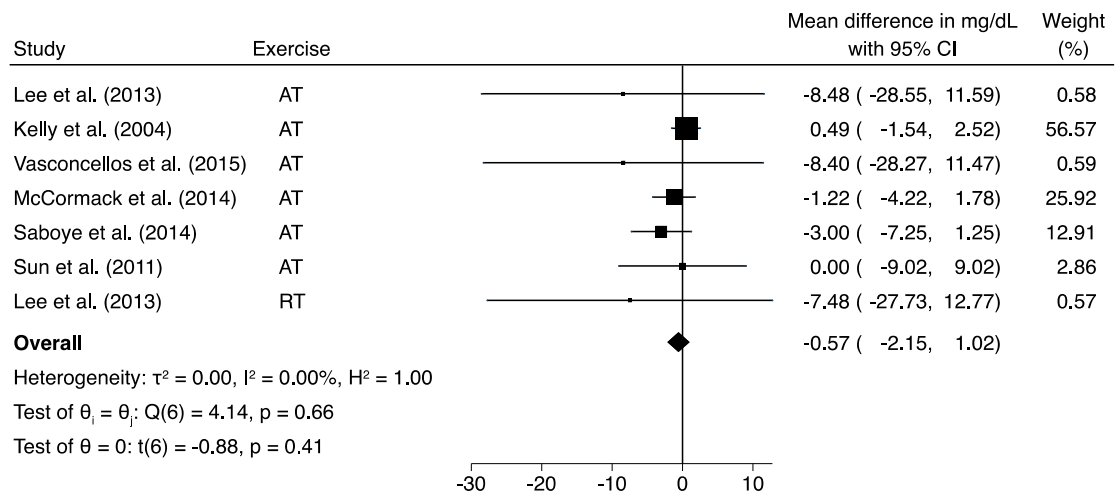

**eFigure 5.** Effect of Exercise Programs on Glycated Hemoglobin in Children and Adolescents With Excess Weight

AT, aerobic training; CT, concurrent training; HIIT, high-intensity interval training;

HIIT+RT, high-intensity interval training and resistance training; RT, resistance

training

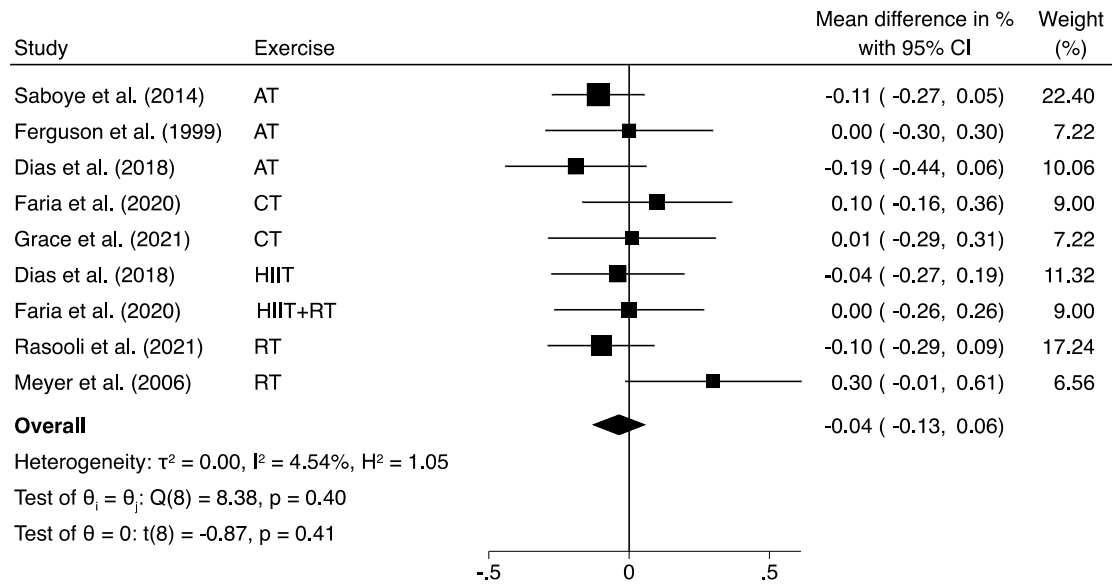

**eFigure 6. Sensitivity Analyses Once Each Study Was Excluded for Fasting Insulin**

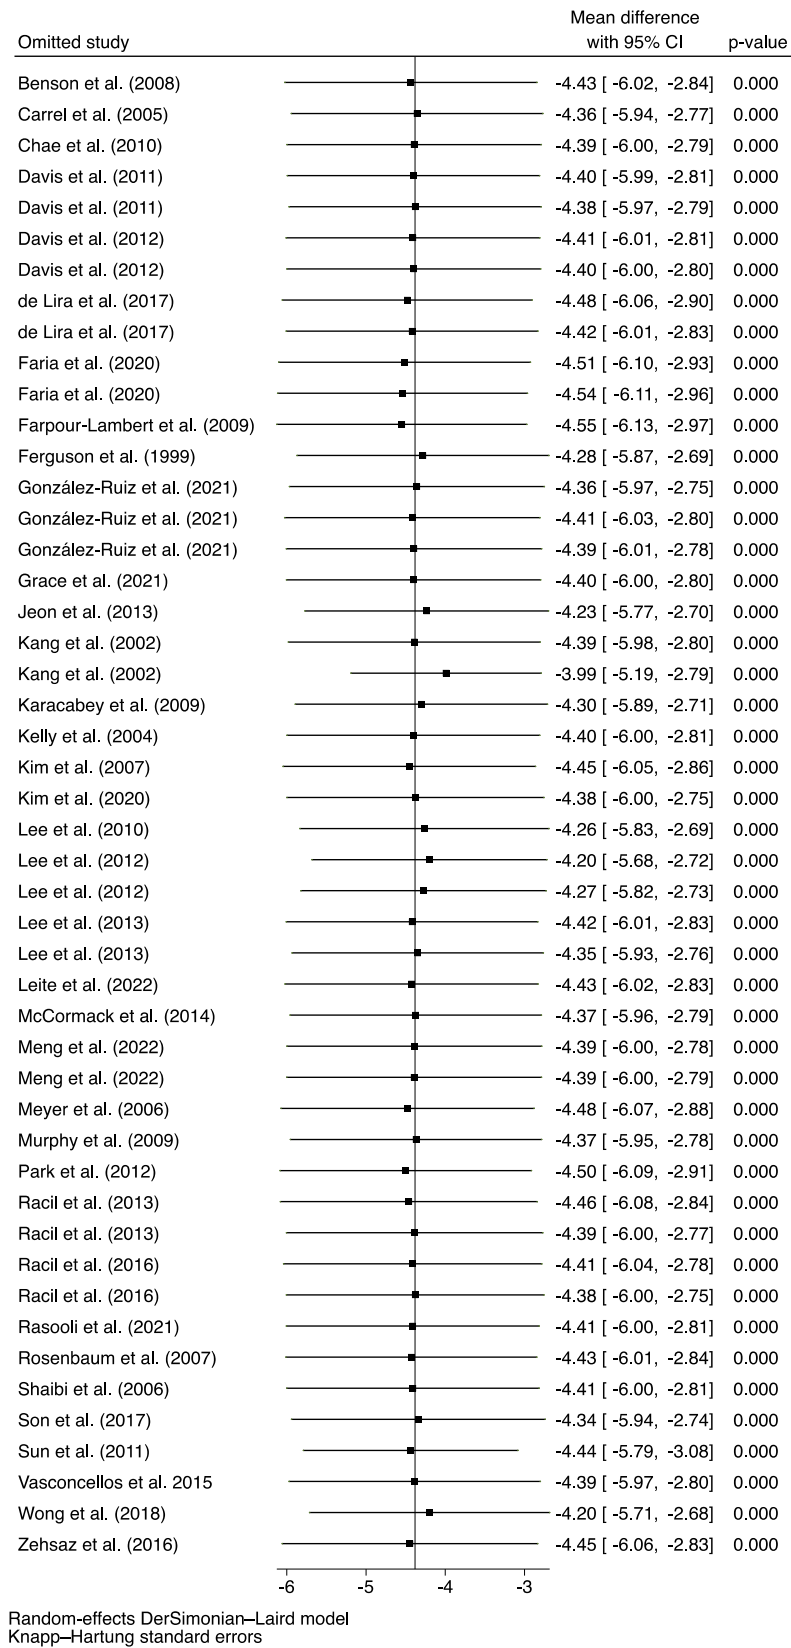

**eFigure 7.** Sensitivity Analyses Once Each Study Was Excluded for Homeostatic Model Assessment for Insulin Resistance (HOMA-IR)

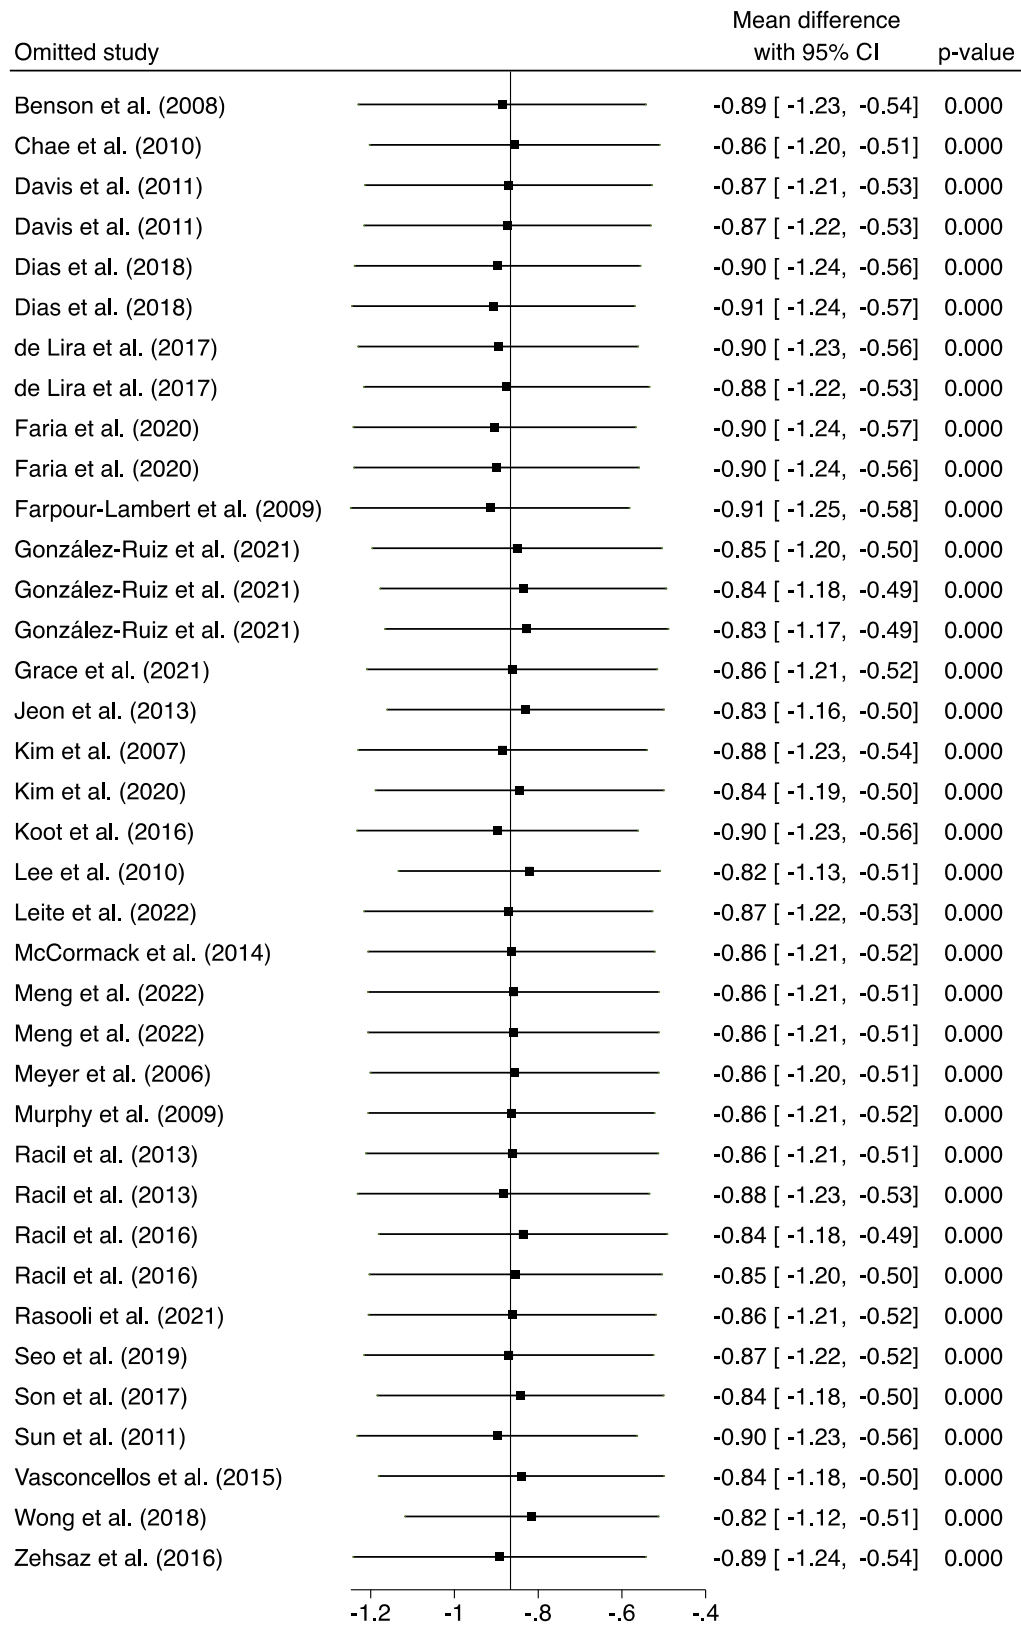

Random-effects DerSimonian–Laird model  
Knapp–Hartung standard errors

**eFigure 8.** Sensitivity Analyses Once Each Study Was Excluded for 2-Hour Oral Glucose Tolerance

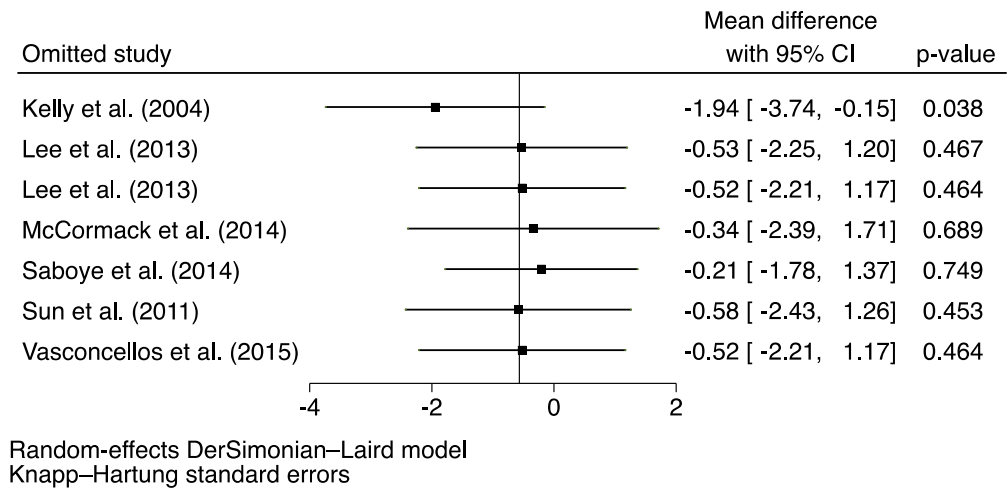

**eFigure 9.** Sensitivity Analyses Once Each Study Was Excluded for Fasting Glucose

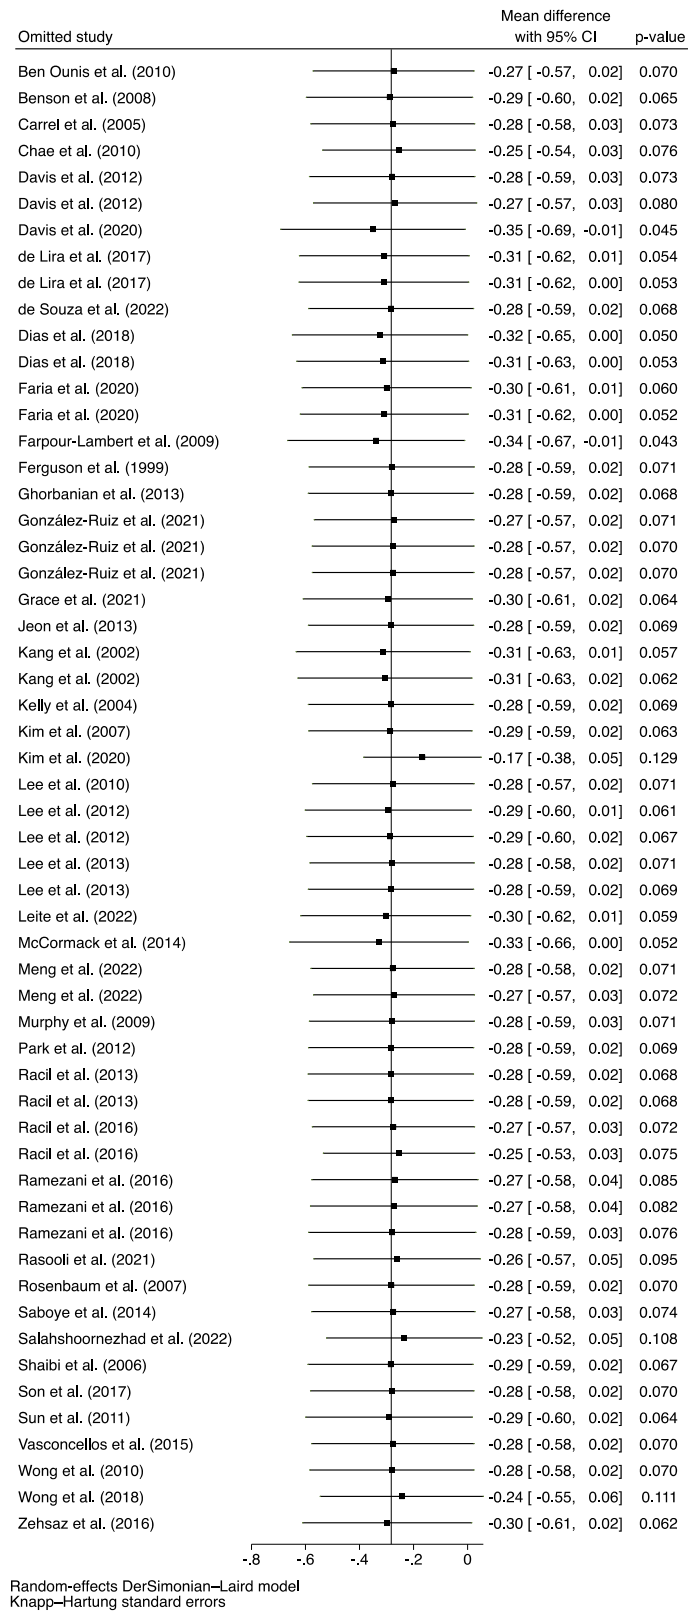



**eFigure 10.** Dose-Response Association Between Metabolic Equivalent of Task Minutes (MET-min) per Week and Differences in Homeostatic Model Assessment for Insulin Resistance (HOMA-IR) in Children and Adolescents With Excess Weight and Insulin Resistance (ie, HOMA-IR  $\geq 3.16$ )

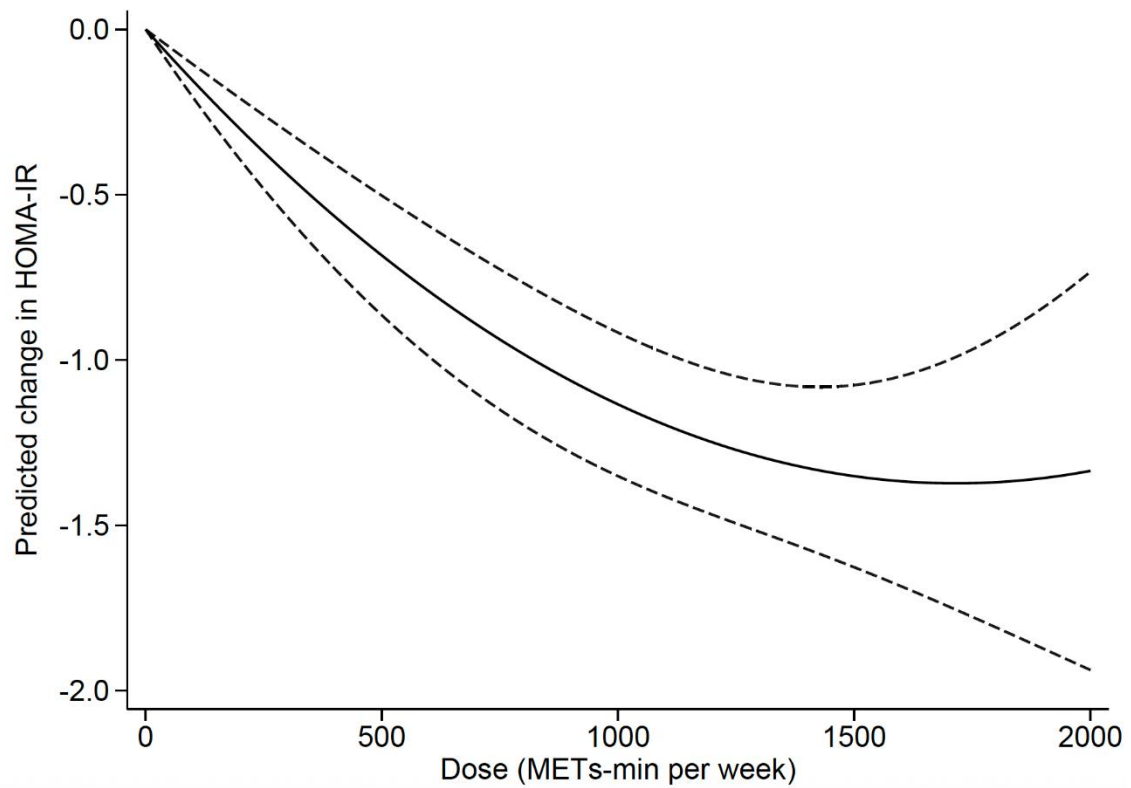

**eFigure 11.** Dose-Response Association Between Metabolic Equivalent of Task Minutes (MET-min) per Week and Differences in Fasting Glucose in Children and Adolescents With Excess Weight

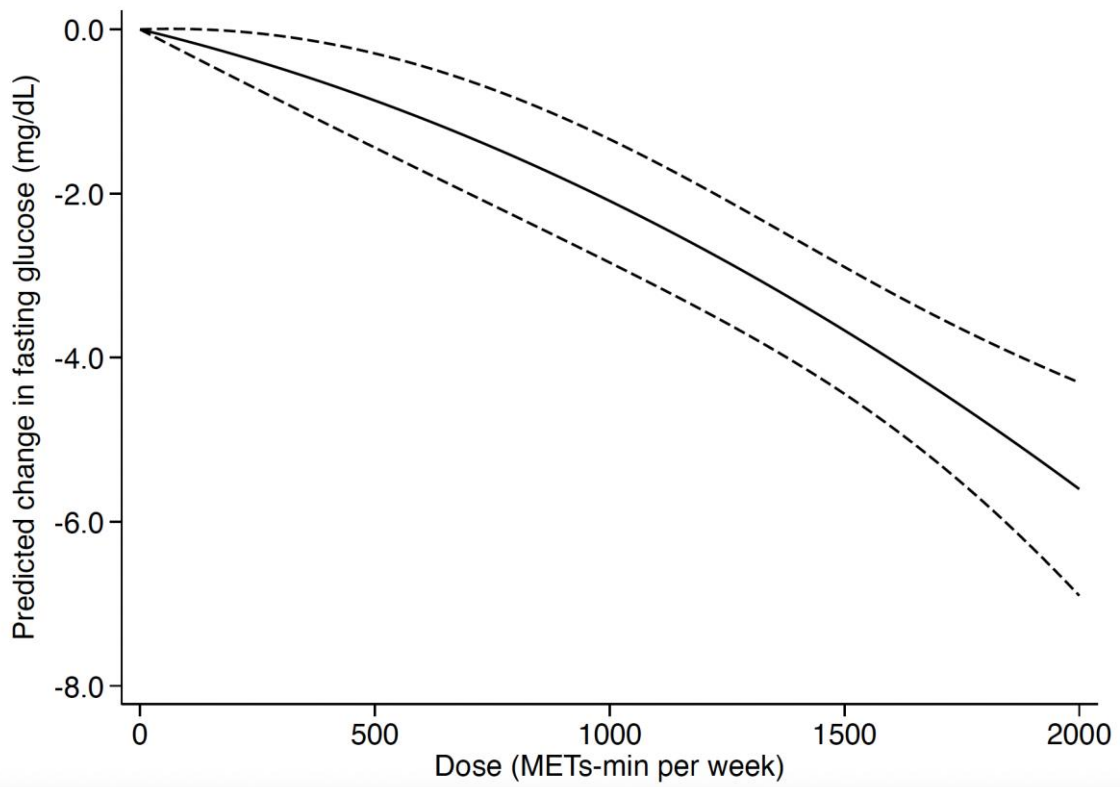

**eFigure 12.** Rankogram for Each Type of Physical Exercise

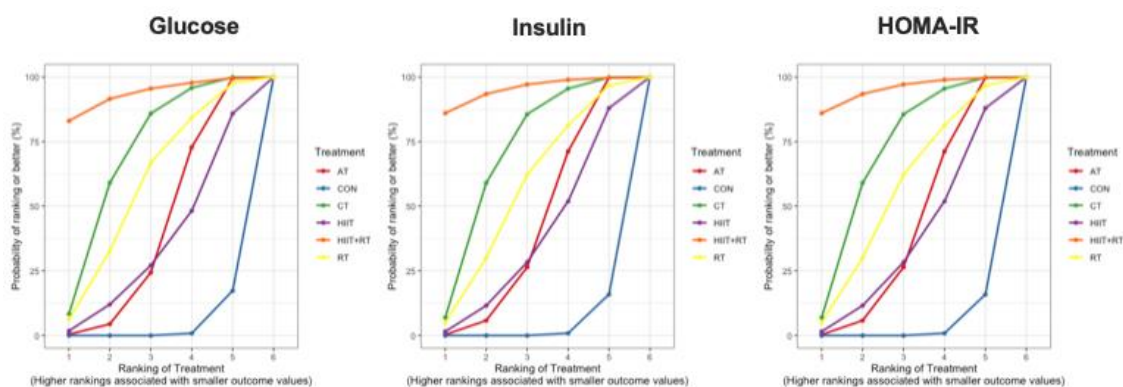

| Glucose levels |       |       |       |       |         |       |
|----------------|-------|-------|-------|-------|---------|-------|
| Rank           | AT    | RT    | CT    | HIIT  | HIIT+RT | CON   |
| 1              | 0.4   | 5.4   | 9.6   | 1.1   | 83.6    | 0.0   |
| 2              | 5.0   | 28.8  | 63.4  | 10.8  | 91.9    | 0.0   |
| 3              | 27.6  | 63.0  | 86.5  | 26.9  | 96.0    | 0.0   |
| 4              | 73.3  | 83.1  | 95.0  | 49.3  | 98.5    | 0.8   |
| 5              | 99.8  | 96.9  | 99.8  | 88.3  | 99.5    | 15.8  |
| 6              | 100.0 | 100.0 | 100.0 | 100.0 | 100.0   | 100.0 |
| SUCRA          | 41.2  | 55.5  | 70.9  | 35.3  | 93.9    | 3.3   |

| Insulin levels |       |       |       |       |         |       |
|----------------|-------|-------|-------|-------|---------|-------|
| Rank           | AT    | RT    | CT    | HIIT  | HIIT+RT | CON   |
| 1              | 0.3   | 4.3   | 8.7   | 1.8   | 84.8    | 0.0   |
| 2              | 4.0   | 26.7  | 65.3  | 10.6  | 93.4    | 0.0   |
| 3              | 23.5  | 62.3  | 89.2  | 27.8  | 97.2    | 0.0   |
| 4              | 72.7  | 81.0  | 96.9  | 49.6  | 98.7    | 1.1   |
| 5              | 99.6  | 97.2  | 99.9  | 86.1  | 99.5    | 17.7  |
| 6              | 100.0 | 100.0 | 100.0 | 100.0 | 100.0   | 100.0 |
| SUCRA          | 40.0  | 54.3  | 72.0  | 35.2  | 94.7    | 3.8   |

| HOMA-IR |       |       |       |       |         |       |
|---------|-------|-------|-------|-------|---------|-------|
| Rank    | AT    | RT    | CT    | HIIT  | HIIT+RT | CON   |
| 1       | 0.3   | 5.1   | 7.0   | 1.5   | 86.1    | 0.0   |
| 2       | 5.8   | 30.0  | 59.2  | 11.6  | 93.5    | 0.0   |
| 3       | 26.4  | 62.4  | 85.7  | 28.3  | 97.2    | 0.0   |
| 4       | 71.3  | 81.4  | 95.6  | 51.9  | 99.0    | 0.9   |
| 5       | 99.8  | 96.8  | 99.8  | 88.0  | 99.7    | 15.9  |
| 6       | 100.0 | 100.0 | 100.0 | 100.0 | 100.0   | 100.0 |
| SUCRA   | 40.7  | 55.1  | 69.4  | 36.3  | 95.1    | 3.4   |

AT, aerobic training; CON, control group; CT, concurrent training; HIIT, high-intensity interval training; HIIT+resistance, high-intensity interval training plus resistance training; HOMA-IR, homeostasis model assessment of insulin resistance; RT, resistance training; SUCRA, Surface Under the Cumulative Ranking curve.

**eFigure 13.** Network Meta-analysis Confidence Rating for Glucose, Insulin, and Homeostatic Model Assessment for Insulin Resistance Outcomes

| Glucose levels |                   |                   |                |               |                |                |                |                   |
|----------------|-------------------|-------------------|----------------|---------------|----------------|----------------|----------------|-------------------|
| Comparison     | Number of studies | Within-study bias | Reporting bias | Indirectness  | Imprecision    | Heterogeneity  | Incoherence    | Confidence rating |
| AT:CON         | 27                | Some concerns     | Some concerns  | No concerns   | No concerns    | Major concerns | No concerns    | Low               |
| AT:CT          | 4                 | Some concerns     | Some concerns  | No concerns   | Some concerns  | Some concerns  | No concerns    | High              |
| AT:HIIT        | 7                 | Some concerns     | Some concerns  | No concerns   | Major concerns | No concerns    | No concerns    | Low               |
| AT:RT          | 4                 | Major concerns    | Some concerns  | No concerns   | Some concerns  | Some concerns  | No concerns    | Low               |
| CON:CT         | 11                | Some concerns     | Some concerns  | No concerns   | Major concerns | No concerns    | No concerns    | Low               |
| CON:HIIT       | 5                 | Major concerns    | Some concerns  | No concerns   | Major concerns | No concerns    | No concerns    | Low               |
| CON:HIIT+RT    | 3                 | Some concerns     | Some concerns  | Some concerns | No concerns    | No concerns    | Major concerns | Low               |
| CON:RT         | 6                 | Some concerns     | Some concerns  | No concerns   | No concerns    | Some concerns  | Major concerns | Low               |
| CT:HIIT+RT     | 3                 | Some concerns     | Some concerns  | Some concerns | No concerns    | No concerns    | Major concerns | Low               |
| CT:RT          | 3                 | Major concerns    | Some concerns  | Some concerns | No concerns    | Major concerns | Major concerns | Low               |
| HIIT:HIIT+RT   | 1                 | Some concerns     | Some concerns  | Some concerns | No concerns    | No concerns    | No concerns    | High              |
| AT:HIIT+RT     | 0                 | Some concerns     | Some concerns  | Some concerns | No concerns    | Some concerns  | Major concerns | Low               |
| CT:HIIT        | 0                 | Some concerns     | Some concerns  | Some concerns | Major concerns | No concerns    | Major concerns | Low               |
| HIIT:RT        | 0                 | Major concerns    | Some concerns  | Some concerns | Some concerns  | Some concerns  | Major concerns | Low               |
| HIIT+RT:RT     | 0                 | Some concerns     | Some concerns  | Some concerns | Major concerns | No concerns    | Major concerns | Low               |
| Insulin levels |                   |                   |                |               |                |                |                |                   |
| Comparison     | Number of studies | Within-study bias | Reporting bias | Indirectness  | Imprecision    | Heterogeneity  | Incoherence    | Confidence rating |
| AT:CON         | 19                | Some concerns     | Some concerns  | No concerns   | No concerns    | Some concerns  | No concerns    | High              |
| AT:CT          | 3                 | Some concerns     | Some concerns  | Some concerns | No concerns    | Major concerns | No concerns    | Low               |
| AT:HIIT        | 6                 | Some concerns     | Some concerns  | No concerns   | No concerns    | Major concerns | No concerns    | Low               |
| AT:HIIT+RT     | 1                 | Some concerns     | Some concerns  | Some concerns | No concerns    | Major concerns | No concerns    | Low               |
| AT:RT          | 2                 | Some concerns     | Some concerns  | Some concerns | Some concerns  | Some concerns  | No concerns    | Moderate          |
| CON:CT         | 10                | Some concerns     | Some concerns  | No concerns   | No concerns    | Some concerns  | No concerns    | High              |
| CON:HIIT       | 4                 | Some concerns     | Some concerns  | No concerns   | No concerns    | Some concerns  | No concerns    | High              |

|              |   |               |               |               |                |               |                |          |
|--------------|---|---------------|---------------|---------------|----------------|---------------|----------------|----------|
| CON:HIIT+RT  | 3 | Some concerns | Some concerns | Some concerns | No concerns    | Some concerns | No concerns    | High     |
| CON:RT       | 4 | Some concerns | Some concerns | No concerns   | Some concerns  | Some concerns | No concerns    | High     |
| CT:HIIT+RT   | 1 | Some concerns | Some concerns | Some concerns | Major concerns | No concerns   | No concerns    | Low      |
| CT:RT        | 2 | Some concerns | Some concerns | Some concerns | Some concerns  | Some concerns | Major concerns | Low      |
| HIIT:HIIT+RT | 1 | Some concerns | Some concerns | Some concerns | Major concerns | No concerns   | No concerns    | Low      |
| CT:HIIT      | 0 | Some concerns | Some concerns | Some concerns | Some concerns  | Some concerns | No concerns    | Moderate |
| HIIT:RT      | 0 | Some concerns | Some concerns | Some concerns | Some concerns  | Some concerns | No concerns    | Moderate |
| HIIT+RT:RT   | 0 | Some concerns | Some concerns | Some concerns | Some concerns  | Some concerns | No concerns    | Moderate |

#### HOMA-IR

| Comparison   | Number of studies | Within-study bias | Reporting bias | Indirectness  | Imprecision    | Heterogeneity  | Incoherence | Confidence rating |
|--------------|-------------------|-------------------|----------------|---------------|----------------|----------------|-------------|-------------------|
| AT:CON       | 15                | Some concerns     | Some concerns  | No concerns   | No concerns    | Some concerns  | No concerns | High              |
| AT:CT        | 2                 | Some concerns     | Some concerns  | Some concerns | No concerns    | Major concerns | No concerns | Low               |
| AT:HIIT      | 5                 | Some concerns     | Some concerns  | No concerns   | No concerns    | Major concerns | No concerns | Low               |
| CON:CT       | 10                | Some concerns     | Some concerns  | No concerns   | No concerns    | Some concerns  | No concerns | High              |
| CON:HIIT     | 5                 | Some concerns     | Some concerns  | No concerns   | No concerns    | Some concerns  | No concerns | High              |
| CON:HIIT+RT  | 3                 | Some concerns     | Some concerns  | Some concerns | No concerns    | Some concerns  | No concerns | High              |
| CON:RT       | 2                 | Major concerns    | Some concerns  | Some concerns | Some concerns  | Some concerns  | No concerns | Low               |
| CT:HIIT+RT   | 2                 | Some concerns     | Some concerns  | Some concerns | Some concerns  | Some concerns  | No concerns | Moderate          |
| CT:RT        | 1                 | Some concerns     | Some concerns  | Some concerns | Some concerns  | Some concerns  | No concerns | Moderate          |
| HIIT:HIIT+RT | 1                 | Some concerns     | Some concerns  | Some concerns | Some concerns  | Some concerns  | No concerns | Moderate          |
| AT:HIIT+RT   | 0                 | Some concerns     | Some concerns  | Some concerns | Some concerns  | Some concerns  | No concerns | Moderate          |
| AT:RT        | 0                 | Some concerns     | Some concerns  | Some concerns | Major concerns | No concerns    | No concerns | Low               |
| CT:HIIT      | 0                 | Some concerns     | Some concerns  | Some concerns | No concerns    | Major concerns | No concerns | Low               |
| HIIT:RT      | 0                 | Some concerns     | Some concerns  | Some concerns | Major concerns | No concerns    | No concerns | Low               |
| HIIT+RT:RT   | 0                 | Some concerns     | Some concerns  | Some concerns | Some concerns  | Some concerns  | No concerns | Moderate          |

AT, aerobic training; CON, control group; CT, concurrent training; HIIT, High Intensity Interval Training; HIIT+RT, High Intensity Interval Training + resistance training; HOMA-IR; Homeostatic Model Assessment for Insulin Resistance; RT, resistance training.

## References

1. Ben Ounis O, Elloumi M, Makni E, et al. Exercise improves the ApoB/ApoA-I ratio, a marker of the metabolic syndrome in obese children. *Acta paediatrica*. 2010;99(11):1679-1685.
2. Benson AC, Torode ME, Singh MAF. The effect of high-intensity progressive resistance training on adiposity in children: a randomized controlled trial. *International Journal of Obesity*. 2008;32(6):1016-1027.
3. Campos RM, de Mello MT, Tock L, et al. Aerobic plus resistance training improves bone metabolism and inflammation in adolescents who are obese. *Journal of strength and conditioning research*. 2014;28(3):758-766.
4. Carrel AL, Clark RR, Peterson SE, Nemeth BA, Sullivan J, Allen DB. Improvement of fitness, body composition, and insulin sensitivity in overweight children in a school-based exercise program: a randomized, controlled study. *Archives of Pediatrics & Adolescent Medicine*. 2005;159(10):963-968.
5. Chae HW, Kwon YN, Rhie YJ, et al. Effects of a structured exercise program on insulin resistance, inflammatory markers and physical fitness in obese Korean children. *Journal of Pediatric Endocrinology and Metabolism*. 2010;23(10):1065-1072.
6. Corte de Araujo AC, Roschel H, Picanço AR, et al. Similar health benefits of endurance and high-intensity interval training in obese children. *Plos one*. 2012;7(8):e42747-e42747.
7. Dâmaso AR, Campos RM da S, Caranti DA, et al. Aerobic plus resistance training was more effective in improving the visceral adiposity, metabolic profile and inflammatory markers than aerobic training in obese adolescents. *Journal of Sports Sciences*. Published online 2014.
8. Davis CL, Litwin SE, Pollock NK, et al. Exercise effects on arterial stiffness and heart health in children with excess weight: The SMART RCT. *International Journal of Obesity (2005)*. 2019;44(5):1152-1163.
9. Davis JN, Gyllenhammer LE, Vanni AA, et al. Startup circuit training program reduces metabolic risk in Latino adolescents. *Medicine and Science in Sports and Exercise*. 2011;43(11):2195-2203.
10. Davis CL, Pollock NK, Waller JL, et al. Exercise dose and diabetes risk in overweight and obese children: A randomized controlled trial. *JAMA-Journal of the American Medical Association*. 2012;308(11):1103-1112.
11. de Lira CT, Dos Santos MA, Gomes PP, et al. Aerobic training performed at ventilatory threshold improves liver enzymes and lipid profile related to non-alcoholic fatty liver disease in adolescents with obesity. *Nutrition and Health*. 2017;23(4):281-288.

12. de Souza F, da Silva LA, Ferreira GS, et al. Karate Training Improves Metabolic Health in Overweight and Obese Adolescents: A Randomized Clinical Trial. *Pediatric Exercise Science*. 2021;34(2):108-118.
13. Dias KA, Ingul CB, Tjønnha AE, et al. Effect of high-intensity interval training on fitness, fat mass and cardiometabolic biomarkers in children with obesity: a randomised controlled trial. *Sports Medicine*. 2018;48(3):733-746.
14. Farah BQ, Ritti-Dias RM, Balagopal P, Hill JO, Prado WL. Does exercise intensity affect blood pressure and heart rate in obese adolescents? A 6-month multidisciplinary randomized intervention study. *Pediatric obesity*. 2014;9(2):111-120.
15. Silva HJG, Andersen LB, Lofrano-Prado MC, et al. Improvements on cardiovascular diseases risk factors in obese adolescents: a randomized exercise intervention study. *Journal of Physical Activity and Health*. 2015;12(4):553-560.
16. Faria WF, Mendonça FR, Santos GC, Kennedy SG, Elias RGM. Effects of 2 Methods of Combined Training on Cardiometabolic Risk Factors in Adolescents: A Randomized Controlled Trial. *Pediatric Exercise Science*. 2020;32(4):217-226.
17. Farpour-Lambert NJ, Aggoun Y, Marchand LM, Martin XE, Herrmann FR, Beghetti M. Physical Activity Reduces Systemic Blood Pressure and Improves Early Markers of Atherosclerosis in Pre-Pubertal Obese Children. *Journal of the American College of Cardiology*. 2009;54:2396-2406.
18. Ferguson MA, Gutin B, Le NA, et al. Effects of exercise training and its cessation on components of the insulin resistance syndrome in obese children. *International journal of obesity and related metabolic disorders: journal of the International Association for the Study of Obesity*. 1999;23(8):889-895.
19. Ghorbanian B, Ravassi A, Kordi MR, Hedayati M. The Effects of Rope Training on Lymphocyte ABCA1 Expression, Plasma ApoA-I and HDL-c in Boy Adolescents. *International Journal of Endocrinology and Metabolism*. 2013;11(2):76-81.
20. González-Ruiz K, Correa-Bautista JE, Izquierdo M, et al. Exercise dose on hepatic fat and cardiovascular health in adolescents with excess of adiposity. *Pediatric obesity*. 2022;17(4):e12869.
21. Grace J, Biggs C, Naicker A, Moss S. Effect of Physical Activity and Nutrition Education on Body Mass Index, Blood Pressure and Biochemical Variables in Overweight and Obese Adolescents. *Annals of Global Health*. 2021;87(1):9-9.
22. Jeon JY, Han J, Kim HJ, Park MS, Seo DY, Kwak YS. The combined effects of physical exercise training and detraining on adiponectin in overweight and obese children. *Integrative Medicine Research*. 2013;2(4):145-150.
23. Kang HS, Gutin B, Barbeau P, et al. Physical training improves insulin resistance syndrome markers in obese adolescents. *Medicine and Science in Sports and Exercise*. 2002;34(12):1920-1927.

24. Karacabey K. The effect of exercise on leptin, insulin, cortisol and lipid profiles in obese children. *The Journal of International Medical Research*. 2009;37(5):1472-1478.
25. Kelly AS, Wetzsteon RJ, Kaiser DR, Steinberger J, Bank AJ, Dengel DR. Inflammation, insulin, and endothelial function in overweight children and adolescents: The role of exercise. *The Journal of Pediatrics*. 2004;145(6):731-736.
26. Kim ES, Im JA, Kim KC, et al. Improved insulin sensitivity and adiponectin level after exercise training in obese Korean youth. *Obesity*. 2007;15(12):3023-3030.
27. Kim J, Son WM, RJ HI, Pekas EJ, Noble JM, Park SY. The effects of a 12-week jump rope exercise program on body composition, insulin sensitivity, and academic self-efficacy in obese adolescent girls. *Journal of Pediatric Endocrinology & Metabolism: JPEM*. 2020;33(1):129-137.
28. Koot BGP, van der Baan-Slootweg OH, Vinke S, et al. Intensive lifestyle treatment for non-alcoholic fatty liver disease in children with severe obesity: inpatient versus ambulatory treatment. *International Journal of Obesity*. 2016;40(1):51-58.
29. Lee S, Deldin AR, White D, et al. Aerobic exercise but not resistance exercise reduces intrahepatic lipid content and visceral 1 fat and improves insulin sensitivity in obese adolescent girls: A randomized controlled trial 2. Published online 2013.
30. Lee S, Libman I, Hughan K, et al. Effects of Exercise Modality on Insulin Resistance and Ectopic Fat in Adolescents with Overweight and Obesity: A Randomized Clinical Trial. *The Journal of Pediatrics*. 2019;206:91-98.
31. Lee KJ, Shin YA, Lee KY, Jun TW, Song W. Aerobic exercise training-induced decrease in plasma visfatin and insulin resistance in obese female adolescents. *International journal of sport nutrition and exercise metabolism*. 2010;20(4):275-281.
32. Lee S, Bacha F, Hannon T, Kuk JL, Boesch C, Arslanian S. Effects of aerobic versus resistance exercise without caloric restriction on abdominal fat, intrahepatic lipid, and insulin sensitivity in obese adolescent boys: a randomized, controlled trial. *Diabetes*. 2012;61(11):2787-2795.
33. Leite N, Tadiotto MC, Corazza PRP, et al. Responsiveness on metabolic syndrome criteria and hepatic parameters after 12 weeks and 24 weeks of multidisciplinary intervention in overweight adolescents. *Journal of endocrinological investigation*. 2022;45(4):741-752.
34. McCormack SE, McCarthy MA, Harrington SG, et al. Effects of exercise and lifestyle modification on fitness, insulin resistance, skeletal muscle oxidative phosphorylation and intramyocellular lipid content in obese children and adolescents. *Pediatric Obesity*. 2014;4(9):281-291.
35. Meng C, Yucheng T, Shu L, Yu Z. Effects of school-based high-intensity interval training on body composition, cardiorespiratory fitness and cardiometabolic markers in adolescent boys with obesity: a randomized controlled trial. *BMC Pediatrics*. 2022;22(1):112-112.



36. Meyer AA, Kundt G, Lenschow U, Schuff-Werner P, Kienast W. Improvement of early vascular changes and cardiovascular risk factors in obese children after a six-month exercise program. *Journal of the American College of Cardiology*. 2006;48(9):1865-1870.
37. Murphy EC, Carson L, Neal W, Baylis C, Donley D, Yeater R. Effects of an exercise intervention using Dance Dance Revolution on endothelial function and other risk factors in overweight children. *International Journal of Pediatric Obesity: IJPO: an Official Journal of the International Association for the Study of Obesity*. 2009;4(4):205-214.
38. Park J, Miyashita M, Kwon Y, et al. A 12-week after-school physical activity programme improves endothelial cell function in overweight and obese children: a randomised controlled study. *BMC Pediatrics*. 2012;12(111).
39. Racil G, Zouhal H, Elmontassar W, et al. Plyometric exercise combined with high-intensity interval training improves metabolic abnormalities in young obese females more so than interval training alone. *Applied Physiology, Nutrition, and Metabolism*. 2016;41(1):103-109.
40. Racil G, Ounis B, Hammouda O, et al. Effects of high vs. moderate exercise intensity during interval training on lipids and adiponectin levels in obese young females. *European Journal of Applied Physiology*. 2013;113(10):2531-2540.
41. Ramezani A, Gaeini AA, Hosseini M, Mohammadi J, Mohammadi B. Effects of Three Methods of Exercise Training on Cardiovascular Risk Factors in Obese Boys. *Iranian Journal of Pediatrics*. 2017;27(5).
42. Rasooli SA, Fathi R, Golzar FAK, Baghersalimi M. The effect of circuit resistance training on plasma levels of amino acids, alpha-hydroxybutyrate, mannose, and urinary levels of glycine conjugated adducts in obese adolescent boys. *Applied physiology, nutrition, and metabolism= Physiologie appliquee, nutrition et metabolisme*. 2021;46(6):561-570.
43. Rosenbaum M, Nonas C, Weil R, Horlick M, Fennoy I, Vargas I. School-based intervention acutely improves insulin sensitivity and decreases inflammatory markers and body fatness in junior high school students. *J Clin Endocrinol Metab*. 2007;92(2):504-508.
44. Salahshornezhad S, Sohrabi Z, Mani A, et al. Effect of a multi-disciplinary program on anthropometric and biochemical parameters in obese and overweight elementary school girls: A randomized clinical trial. *Nutrition, Metabolism and Cardiovascular Diseases*. 2022;32(8):1982-1989.
45. Savoye M, Caprio S, Dziura J, et al. Reversal of early abnormalities in glucose metabolism in obese youth: results of an intensive lifestyle randomized controlled trial. *Diabetes care*. 2014;37(2):317-324.
46. Seo YG, Lim H, Kim Y, et al. The Effect of a Multidisciplinary Lifestyle Intervention on Obesity Status, Body Composition, Physical Fitness, and Cardiometabolic Risk Markers in Children and Adolescents with Obesity. Published online 2019.

47. Shaibi GQ, Cruz ML, Ball GD, et al. Effects of resistance training on insulin sensitivity in overweight Latino adolescent males. *Medicine and science in sports and exercise*. 2006;38(7):1208-1215.
48. Son WM, Sung KD, Bharath LP, Choi KJ, Park SY. Combined exercise training reduces blood pressure, arterial stiffness, and insulin resistance in obese prehypertensive adolescent girls. *Clinical and Experimental Hypertension*. 2017;39(6):546-552.
49. Sun M xiao, Huang X qing, Yan Y, et al. One-hour after-school exercise ameliorates central adiposity and lipids in overweight Chinese adolescents: a randomized controlled trial. *Chinese Medical Journal*. 2011;124(3):323-329.
50. Tjønnå AE, Stølen TO, Bye A, et al. Aerobic interval training reduces cardiovascular risk factors more than a multitreatment approach in overweight adolescents. Published online 2009.
51. Vasconcellos F, Seabra A, Cunha F, et al. Health markers in obese adolescents improved by a 12-week recreational soccer program: a randomised controlled trial. Published online 2016.
52. Wong PC, Chia MY, Tsou IY, et al. Effects of a 12-week exercise training programme on aerobic fitness, body composition, blood lipids and C-reactive protein in adolescents with obesity. *Annals of the Academy of Medicine, Singapore*. 2008;37(4):286-293.
53. Wong A, Sanchez-Gonzalez MA, Son WM, Kwak YS, Park SY. The Effects of a 12-Week Combined Exercise Training Program on Arterial Stiffness, Vasoactive Substances, Inflammatory Markers, Metabolic Profile, and Body Composition in Obese Adolescent Girls. *Pediatric Exercise Science*. 2018;30(4):480-486.
54. Yetgin MK, Agopyan A, Küçükler FK, et al. The Effects of Resistance and Aerobic Exercises on Adiponectin, Insulin Resistance, Lipid Profile and Body Composition in Adolescent Boys with Obesity. *Istanbul Medical Journal*. 2020;21(3).
55. Zehsaz F, Farhangi N, Ghahramani M. The response of circulating omentin-1 concentration to 16-week exercise training in male children with obesity. *The Physician and Sportsmedicine*. 2016;44(4):355-361.
56. Jackson D, Turner R. Power analysis for random-effects meta-analysis. *Wiley Online Library*. 2017;8(3):290-302. doi:10.1002/jrsm.1240
57. Higgins J, Green S. *Cochrane Handbook for Systematic Reviews of Interventions*. Published online 2011.
58. Furuya-Kanamori L, Barendregt JJ, Doi SA. A new improved graphical and quantitative method for detecting bias in meta-analysis. *JBIC Evidence Implementation*. 2018;16(4):195-203.
59. Ainsworth BE, Haskell WL, Herrmann SD, et al. 2011 Compendium of Physical Activities: a second update of codes and MET values. *Medicine and Science in Sports and Exercise*. 2011;43(8):1575-1581.

60. Crippa A, Discacciati A, Bottai M, Spiegelman D, Orsini N. One-stage dose–response meta-analysis for aggregated data. *Statistical Methods in Medical Research*. 2019;28(5):1579-1596. doi:10.1177/0962280218773122
61. Keskin M, Kurtoglu S, Kendirci M, Atabek ME, Yazici C. Homeostasis Model Assessment Is More Reliable Than the Fasting Glucose/Insulin Ratio and Quantitative Insulin Sensitivity Check Index for Assessing Insulin Resistance Among Obese Children and Adolescents. *Pediatrics*. 2005;115(4):e500-e503. doi:10.1542/peds.2004-1921
62. TONIN FS, ROTTA I, MENDES AM, PONTAROLO R. Network meta-analysis: a technique to gather evidence from direct and indirect comparisons. *Pharmacy Practice (1886-3655)*. 2017;15(1).
63. Higgins JPT, Thompson SG. Quantifying heterogeneity in a meta-analysis. *Statistics in Medicine*. 2002;21(11):1539-1558. doi:10.1002/sim.1186
64. Chaimani A, Higgins JP, Mavridis D, Spyridonos P, Salanti G. Graphical tools for network meta-analysis in STATA. *Plos one*. 2013;8(10):e76654-e76654.
65. Salanti G, Ades AE, Ioannidis JP. Graphical methods and numerical summaries for presenting results from multiple-treatment meta-analysis: an overview and tutorial. *Journal of Clinical Epidemiology*. 2010;64(2):163-171.
66. DerSimonian R, Laird N. Meta-analysis in clinical trials. *Controlled Clinical Trials*. 1986;7(3):177-188. doi:10.1016/0197-2456(86)90046-2
67. White IR. Network meta-analysis. *Stata Journal*. 2015;15(4):951-986.
68. Higgins JPT. Measuring inconsistency in meta-analyses. *BMJ*. 2003;327(7414):557-560. doi:10.1136/bmj.327.7414.557
