# Supplementary material
Source: PubMed Central journal article supplement (PMC10562991)
Supplement: jamapediatr-e234038-s002.pdf [file jamapediatr-e234038-s002.pdf]

## Data Sharing Statement

García-Hermoso. Exercise and Insulin Resistance Markers in Children and Adolescents With Excess Weight. *JAMA Pediatr.* Published October 09, 2023.  
doi:10.1001/jamapediatrics.2023.4038

### Data

**Data available:** No
